1 **ISX-9 manipulates endocrine progenitor fate revealing conserved intestinal**  
2 **lineages in mouse and human.**

3 Anastasia Tsakmaki<sup>1\*</sup>, Patricia Fonseca Pedro<sup>1\*</sup>, Polychronis Pavlidis<sup>2</sup>, Bu'Hussain  
4 Hayee<sup>3</sup> and Gavin A Bewick<sup>1</sup>.

5  
6 <sup>1</sup>Diabetes Research Group, School of Life Course Sciences, Faculty of Life Science and  
7 Medicine, King's College London, London, UK.

8 <sup>2</sup>Centre for Inflammation Biology and Cancer Immunology, King's College London, London,  
9 UK.

10 <sup>3</sup>Department of Gastroenterology, King's College Hospital NHS Foundation Trust, London,  
11 United Kingdom

12 \* These authors contributed equally.

13  
14 **Running title: ISX-9 manipulates gut endocrine specification**

15 **Key Words:** Organoid, enteroendocrine, gut hormone, stem cell, progenitor, differentiation,  
16 isoxazole, intestine, enterochromaffin cells

17  
18 **Abstract**

19 Enteroendocrine cells (EECs) survey the gut luminal environment and co-ordinate hormonal,  
20 immune and neuronal responses to it. They exhibit well characterised physiological roles ranging from  
21 the control of local gut function to whole body metabolism, but little is known regarding the regulatory  
22 networks controlling their differentiation, especially in human gut.

23 The small molecule Isoxazole-9 (ISX-9) stimulates neuronal and pancreatic beta-cell  
24 differentiation, both closely related to EEC differentiation. We used ISX-9 as a tool to explore EEC  
25 specification in mouse and human intestinal organoids. ISX-9 increased the number of neurogenin3  
26 (*Ngn3*) positive endocrine progenitor cells and upregulated *NeuroD1* and *Pax4*, transcription factors  
27 which play roles in mouse EEC specification. Single cell analysis revealed induction of *Pax4* expression  
28 in a developmentally late *Ngn3*<sup>+</sup> population of cells and potentiation of genes associated with  
29 progenitors biased towards serotonin-producing enterochromaffin (EC) cells. This coincided with  
30 enrichment of organoids with functional EC cells which was partly dependent on stimulation of  
31 calcium signalling in a population of cells residing outside the crypt base. Inducible *Pax4*  
32 overexpression, in ileal organoids, uncovered its importance as a component of early human

1 endocrine specification and highlighted the potential existence of two major endocrine lineages, the  
2 early appearing enterochromaffin lineage and the later developing peptidergic lineage which contains  
3 classical gut hormone cell types.

4 Our data provide proof-of-concept for the controlled manipulation of specific endocrine  
5 lineages with small molecules, whilst also shedding new light on human EEC differentiation and its  
6 similarity to mouse. Given their diverse roles, understanding endocrine lineage plasticity and its  
7 control could have multiple therapeutic implications.

8

## 9 **Introduction**

10 The intestinal epithelium is a key interface with our external environment. It renews itself  
11 every 4-5 days and is composed of 5 terminally differentiated cell types; the absorptive enterocytes  
12 and the secretory Paneth, goblet, tuft and enteroendocrine cells (Gehart and Clevers, 2019). These  
13 cells are constitutively generated by cycling Lgr5<sup>+</sup> crypt stem cells and together they orchestrate the  
14 epithelium's major functions, nutrient absorption and defence. Despite representing only 1% of the  
15 epithelium, the enteroendocrine cells (EECs) constitute the largest hormone producing tissue and  
16 have been described as the gut's sentinels. They sample the luminal, circulating and local tissue  
17 environments and co-ordinate an appropriate response from the epithelium, immune and nervous  
18 systems (Gribble and Reimann, 2016). For example, they play a key role in controlling the response to  
19 a meal, fine tuning physiology to ensure optimal fuel absorption, use and storage (Sam et al., 2012).  
20 Gut hormones exhibit actions ranging from the local control of gut motility, absorption and secretion,  
21 to the regulation of whole-body metabolism (Melvin et al., 2016). Whilst there is a large body of  
22 evidence describing the functional roles of gut hormones comparatively little is known about the  
23 factors which control EEC differentiation and assign subset identity.

24 EECs were originally classified by immunostaining according to their dominant hormone product;  
25 Glucagon-like peptide 1 (GLP-1), Glucagon-like peptide 2 (GLP-2) and Peptide YY (PYY) are secreted by  
26 L cells, Glucose-dependent insulinotropic polypeptide (GIP) by K cells, Somatostatin (SST) by D cells,  
27 Cholecystokinin (CCK) by I cells, Secretin (SCT) by S cells, Gastrin (GAST) by G cells, Serotonin by  
28 enterochromaffin (EC) cells, and Neurotensin (NTS) by N cells. Recent use of fluorescent reporter mice  
29 and transcriptomics has revealed EEC subsets maybe less well defined (Adriaenssens et al., 2015;  
30 Engelstoft et al., 2015; Habib et al., 2012; Knudsen et al., 2015). The hormonal repertoire of an EEC is  
31 a function of its differentiation trajectory, its location within the gut and its height in the crypt-villus  
32 axis, which dictates differential exposure to Wnt and BMP signalling gradients (Basak et al., 2017;  
33 Beumer et al., 2018). Mouse lineage tracing studies have identified a handful of transcription factors  
34 (TFs) regulating EEC differentiation. Cells exiting the stem cell compartment are fated to be secretory

1 cells by *Notch* inhibition, followed by *Atoh1* expression (Zecchini et al., 2005) (Fre et al., 2005; Stanger  
2 et al., 2005). *Atoh*<sup>+</sup> cells are then designated to the endocrine lineage by expression of the bHLH TF  
3 neurogenin3 (*Ngn3*) (Li et al., 2011). In mouse, TFs downstream of *Ngn3* known to be necessary for  
4 subset specification include *Insm1* (substance P, NTS) (Gradwohl et al., 2000), neurogenic  
5 differentiation 1 (*NeuroD1*) (SCT, CCK) (Mutoh et al., 1997; Mutoh et al., 1998; Naya et al., 1997),  
6 *Nkx2.2* (CCK, GAST, GIP and SST) (Desai et al., 2008), *Pax4* (5-HT, SCT, GIP, PYY, CCK) (Beucher et al.,  
7 2012) *Pax6*, *Foxa1* and *Foxa2* (Preproglucagon and its products GLP-1 and 2) (Ye and Kaestner, 2009),  
8 *Arx* (GLP-1, GIP, CCK, SCT, GAST and GHRL) (Beucher et al., 2012), and *Lmx1A* (5-HT) (Gross et al.,  
9 2016). Nevertheless, the regulatory networks controlling EEC identity have remained largely unknown,  
10 until a recent sophisticated study described a time resolved transcriptional road map of mouse EEC  
11 fate trajectories (Gehart et al., 2019). It now appears classical TFs are more promiscuous than lineage  
12 tracing implied. Furthermore, there is a paucity of knowledge regarding EEC specification in human  
13 intestinal epithelium due to lack of tractable model systems, although, several of the classical TFs are  
14 upregulated in response to a *NGN3* pulse in intestinal organoids derived from human pluripotent stem  
15 cells (Sinagoga et al., 2018; Spence et al., 2011). Understanding the factors which control gut  
16 endocrine pedigree has implications for several clinical conditions including diabetes, obesity, gut  
17 inflammatory disorders and perhaps cognitive disorders including depression and anxiety.  
18 Deciphering how to manipulate EECs may open novel treatment avenues and offer a clearer  
19 understanding of epithelial homeostasis.

20 To identify a candidate molecule which might influence EEC fate we drew parallels from other  
21 endocrine tissues. Gut endocrine specification is strikingly like that in the pancreas and both bear close  
22 resemblance to neuronal differentiation. The small molecule isoxazole-9, (*N*-cyclopropyl-5-  
23 (thiophen-2-yl)isoxazole-3-carboxamide (ISX-9), was uncovered in a chemical screen for drivers of  
24 neuronal differentiation (Schneider et al., 2008). It activates *NeuroD1* and has also been used to  
25 investigate pancreatic beta-cell differentiation (Dioum et al., 2011; Kalwat et al., 2016). We explored  
26 the effects of ISX-9 on EEC identity in organoids derived from mouse and human tissue resident stem  
27 cells. Our data demonstrate proof-of-concept that specific EEC populations can be manipulated with  
28 a small molecule, highlight the similarities between mouse and human EEC differentiation and provide  
29 a tool to study human enterochromaffin cells *in vitro*.

30

## 31 **Results**

### 32 **ISX-9 increases the expression of transcription factors associated with EEC differentiation.**

33 ISX-9, increases expression of *NeuroD1* and induces differentiation of neuronal (Schneider et  
34 al., 2008), cardiac (Sadek et al., 2008) and islet endocrine progenitors (Dioum et al., 2011). We

1 wondered if these properties could be harnessed to manipulate gut endocrine differentiation. Mouse  
2 small intestinal organoids exposed to increasing doses of ISX-9 (48-hr treatment) had increased  
3 expression of transcription factors known to be important for endocrine specification (Fig. 1A-F). As  
4 expected, ISX-9 dose-dependently increased *NeuroD1*, mimicking its role in other tissues (Fig. 1A).  
5 Interestingly, *Ngn3*, a transcription factor usually associated with the earliest identifiable endocrine  
6 progenitor cell (Li et al., 2011) and thought of being upstream of *NeuroD1*, was also increased (Fig.  
7 1B). Other downstream TFs were differentially affected by ISX-9, with *Pax4* being increased whilst *Arx*  
8 was unaffected (Fig. 1C and D). *Atoh1* expression was inhibited at 40 and 80  $\mu$ M but there was little  
9 effect on *Hes1* expression at any dose, an indirect measure of Notch signalling (Fig. 1E and F). Notch  
10 and *Atoh1* control the gate between the secretory and absorptive lineages (Li et al., 2011). These data  
11 suggest ISX-9 may act downstream of this node and could favour the differentiation of specific EEC  
12 subsets based on its opposing effects on *Pax4* and *Arx*.

13 We chose to use the 40  $\mu$ M dose in further experiments since at higher doses ISX-9 strongly  
14 inhibited *Atoh1* and did not significantly increase *NeuroD1*. To explore the effect of ISX-9 on gut  
15 epithelial homeostasis and EEC specification we designed the following protocol. After passage,  
16 intestinal organoid cultures were maintained in stem cell growth media (WENR) for 3 days to create a  
17 stem cell enriched baseline. We then switched to differentiation media (ENR) and exposed cultures to  
18 ISX-9 for up to 4 days, the previously reported timeframe for maturation of EECs in intestinal organoids  
19 (Petersen et al., 2014). ISX-9 increased the expression of *Ngn3* and *NeuroD1* at 24, 48 and 96 hrs but  
20 only increased chromogranin A (*Chga*), a gene selectively expressed in terminal differentiated EECs  
21 (Engelstoft et al., 2015), at 96 hrs (Fig. 1G-I). This was highly reflective of the known differentiation  
22 trajectory of the EEC lineage. We next refined our paradigm to consist of a 48-hr pulse of ISX-9 at the  
23 beginning of the 4-day differentiation period, on day 3 of the protocol (Fig. 1J). This removed a direct  
24 effect of ISX-9 as a confounding factor and ensured measurements made at the end of the protocol  
25 could be more easily attributed to altered cell fate. In this paradigm *Ngn3* expression was unchanged  
26 whilst *NeuroD1*, which is expressed in all early to late EEC subsets, remained elevated at 96 hrs  
27 indicating the ISX-9 pulse increased EEC specification in mouse intestinal organoids (Fig. 1K).

28

### 29 **ISX-9 specifically enriches markers of EC cells and does not affect organoid growth.**

30 Having established a paradigm in which ISX-9 appeared to increase EEC differentiation, there  
31 was a need to determine if this was authentic manipulation of cell fate or a consequence of increasing  
32 general organoid growth. We measured the morphological characteristics of organoids at different  
33 time points during our protocol; day 3 at baseline, day 5 immediately following the ISX-9 pulse, and  
34 day 7, the end of the differentiation period. There were no obvious differences between ISX-9-treated

1 and control organoids in their general appearance or growth rates (Fig. 2A). Equally, we found no  
2 difference between treatment and control in either surface area or perimeter of the organoids (Fig.  
3 2B and C). We noted a trend for a reduction in the proportion of very budded ISX-9-treated organoids  
4 (those with greater than 5 buds) at day 7 (Fig. 2D). This could suggest a reduction in stem cell  
5 proliferative capacity. However, in accordance with the surface area and perimeter observations, the  
6 number of EdU<sup>+</sup> cells (a marker of cells in S-phase and therefore undergoing proliferation) did not  
7 differ between treatments immediately post ISX-9 treatment or at the end of the study (Fig. 2E and  
8 F). These results expand our evidence that ISX-9 alters cell fate and increases the EEC lineage  
9 independently of organoid growth.

10 To probe the effect of ISX-9 on epithelial lineages and EEC subset differentiation we analysed  
11 the expression of markers of individual cell types at the end of the differentiation protocol. In line with  
12 the growth data, expression of villin (*Vil1*), a general epithelial marker, was unaltered between groups,  
13 as was the marker for goblet cells mucin 2 (*Muc2*) (Fig. 2G). The marker for stem cells, leucine-rich  
14 repeat-containing G-protein-coupled receptor 5 (*Lgr5*), was slightly increased but not significantly,  
15 whilst the enterocyte marker, alkaline phosphatase (*Alpi*) and the Paneth cell marker, lysozyme (*Lyz1*),  
16 were significantly reduced (Fig. 2G). Within the EEC lineage ISX-9 increased markers of I cells (*Cck*) and  
17 enterochromaffin cells (Tachykinin Precursor 1 (*Tac1*), tryptophan hydroxylase 1 (*Tph1*) and  
18 chromogranin A, (*ChgA*)) (Fig. 2H). TPH1 is the rate limiting enzyme for peripheral serotonin (5-HT)  
19 production and enterochromaffin (EC) cells are the most numerous gut endocrine cell type, producing  
20 90% of the body's peripheral serotonin (Gross et al., 2016). Expression of L cell markers were  
21 unchanged (*Pyy*) or reduced (*Gcg*), as was the marker for K cells (*Gip*) (Fig. 2H). The markers for D cells  
22 (*Sst*), N Cells (*Nts*), X cells (*Ghrl*) and the promiscuous marker secretin (*Sct*) were all unchanged in  
23 response to ISX-9 (Fig. 2H). Together, these data imply ISX-9 specifically increases the EEC lineage and  
24 drives cells to be fated towards enterochromaffin cells and *Cck* expressing cells rather than other  
25 mature EEC subtypes.

26

### 27 **ISX-9 increases *Ngn3* endocrine fated populations.**

28 To determine if we were observing specific alterations in EEC cell fate, we used lineage tracing,  
29 fluorescent activated cell sorting, single cell RNA-seq and immunostaining. First, we generated small  
30 intestinal organoids from *Tg(Ngn3-RFP)* mice which mark the *Ngn3* progenitor pool with turbo RFP  
31 (Kim et al., 2015). We saw a 5-fold increase in the percentage of *Ngn3*<sup>+</sup> cells immediately after ISX-9  
32 treatment, using flow cytometry, corroborating our expression data (Fig.3A).

33 To uncover the effect of ISX-9 on sub-populations of *Ngn3*<sup>+</sup> cells and to attempt to identify its  
34 key regulatory mechanisms we employed single cell RNA-seq on sorted RFP<sup>+</sup> cells immediately after

1 the ISX-9 treatment. Unsupervised clustering of conserved markers between control and ISX-9 treated  
2 cells identified 9 clusters split into two major branches, endocrine and non-endocrine (Fig. 3B and C).  
3 The endocrine lineage contained 5 clusters; Early-*Ngn3* (Hi *Ngn3*, *Sox4*), Late-*Ngn3* (Hi *Ngn3*, *Cnot6l*,  
4 *Nkx2-2*, *Neurod1*, *Pax4*, *Runx1t1*), Endocrine progenitor (*Tac1*, *Chgb*, *Hmgn3*, *Cited2*), EC (*Chga*, *Tph1*,  
5 *Lmx1a*, *Reg4*) and EEC (*Pyy*, *CCK*, *Gcg*, *Nts*) (Fig. 3B, Suppl. Fig. 1A). The EC and EEC clusters are  
6 consistent with recent reports of two major branches of endocrine development, one containing EC  
7 cells and the other containing peptidergic gut hormone producing cell types (Gehart et al., 2019; Julie  
8 Piccand, 2019). The non-endocrine branch consisted of four clusters. One we designated as Goblet  
9 progenitors which exhibited strong goblet cell marker expression (eg. *Spink4*, *Muc2*, *Tff3*) but also  
10 contained Paneth cell markers (eg. *Lyz1*, *Defa24*). Two other clusters were identified as enterocyte  
11 progenitors on account of their expression of *Cftr* and *Krt19*, these clusters were distinguished from  
12 one another by one cluster expressing markers of proliferation (*Top2A*, *Mik67*) (Fig. 3B, Suppl. Fig. 1A).  
13 An additional hard to define cluster was designated as non-endocrine progenitors (*Fryl*, *Plac8*, *Stat1*,  
14 *Grk4*).

15 Examination of the cluster distributions by treatment revealed an increased proportion of cells  
16 in the developmentally early endocrine clusters, Early-*Ngn3* and Late-*Ngn3*, in response to ISX-9 (Fig.  
17 3D). Coincidentally there was a reduction in the number of cells in the non-endocrine branch (Fig. 3D).  
18 Given the increased expression of EC markers and the I cell marker *Cck* in our original experiments,  
19 ISX-9 plausibly biases endocrine lineage cells towards these pedigrees. However, a closer examination  
20 of *Cck* expression demonstrated a low level of promiscuous expression throughout the endocrine  
21 branch in contrast to other classical gut hormones which were restricted to the EEC cluster (Fig. 3B).  
22 We explored possible mechanisms of EC bias by examining TFs known to regulate endocrine  
23 differentiation. ISX-9 increased the expression of *Ngn3* and *NeuroD1* in the Late-*Ngn3* cluster but  
24 notably increased both the expression and percentage of cells expressing *Pax4* in this cluster (Fig. 3E-  
25 G). Strikingly, ISX-9 increased the expression of genes associated with EC progenitor bias (*Rfx6*, *Fev*,  
26 *Prdm16* and *Hmgn3*) whilst reducing genes associated with EEC bias (*Isl1*, *Arx* and *Cdkn1a*) (Fig. 3E and  
27 F, Suppl. Fig. 1B) (Gehart et al., 2019).

28 Together these data suggest ISX-9 increases the flux of cells through the endocrine branch in  
29 part at the expense of the non-endocrine route and increases the expression of an EC biased genetic  
30 program in these endocrine progenitors. In addition, the powerful increase in both *Pax4* expression  
31 and the percentage of *Pax4*<sup>+</sup> cells in the late *Ngn3* cluster highlights a potentially novel mechanism of  
32 early EC bias in response to ISX-9 (Fig. 3E and G).

33

34



1 **ISX-9 increases the Ngn3 lineage and enriches it with functional EC cells.**

2 Next, we took advantage of a *Tg(Ngn3-cre)C1Able/J::R26-loxSTOPlox-tdRFP* (*Ngn3-Cre-RFP*)  
3 reporter transgenic line to examine the whole endocrine lineage including the *Ngn3*<sup>+</sup> progenitor pool  
4 and all daughter cell types (Fig. 4A) (Luche et al., 2007; Schonhoff et al., 2004b). A 48-hr ISX-9 pulse  
5 increased the percentage of tdRFP<sup>+</sup> cells analysed by flow cytometry (Fig. 4B) and doubled the number  
6 of tdRFP<sup>+</sup> cells per organoid (Fig. 4C). Expression analysis of sorted populations confirmed our earlier  
7 findings, with *Ngn3* and *NeuroD1* being increased immediately after 48-hr ISX-9 treatment whilst *Lyz1*  
8 (*Paneth*) was reduced and *Muc2* (goblet) and *ChgA* (EC cell) were unaltered (Suppl. Fig. 2A). Forty-  
9 eight hours later, after removal of ISX-9, *Ngn3* was normalised, *Muc2* was unchanged, *Lyz1* remained  
10 reduced, *NeuroD1* remained elevated and as expected *ChgA* was 3-fold increased (Fig. 4D), providing  
11 evidence that ISX-9 increases the endocrine progenitor pool and biases a proportion of these cells to  
12 become specific EC cells.

13 To further substantiate the expression data and demonstrate the programming of specific  
14 EEC subsets we generated organoids from a *CCK-iCre::R26-loxSTOPlox-eYFP* reporter mouse (*CCK-Cre-*  
15 *eYFP*) (D'Agostino et al., 2016; Flak et al., 2014). ISX-9 increased the number of eYFP<sup>+</sup> cells per organoid  
16 by almost 3-fold (Suppl. Fig. 2B-C) and produced a similar increase in the percentage of eYFP<sup>+</sup> cells by  
17 flow cytometry analysis (Suppl. Fig. 2D). In lieu of the availability of reporter mice for either  
18 chromogranin A or serotonin we used immunocytochemistry to measure the effect of ISX-9 on the EC  
19 cell lineage. Double staining of whole organoids revealed 3 cell populations: singly labelled 5-HT<sup>+</sup> and  
20 CHGA<sup>+</sup> cells, and cells which co-localised these antigens (Fig. 4E). ISX-9 increased the total number of  
21 5-HT<sup>+</sup> cells by 2-fold and CHGA<sup>+</sup> cells by 4-fold (Fig. 4F and G). Analysis of the proportion of single  
22 versus co-localised cells revealed the increase to be driven mainly by cells expressing both 5-HT and  
23 CHGA, which are likely endocrine EC cells (Fig. 4H). ISX-9 increased organoid 5-HT content and these  
24 newly generated cells were functional, releasing measurable 5-HT in response to stimulus (Fig. 4I). ISX-  
25 9 did not alter GLP-1<sup>+</sup> immunofluorescent cell number (Fig. 4K) despite *Gcg* expression being reduced,  
26 underpinning the selectivity of ISX-9's effect.

27

28 **Enterochromaffin cell enrichment is partly dependent on ISX-9 induced calcium signalling.**

29 Mechanistically, ISX-9 promotes neuronal differentiation by stimulating intracellular calcium  
30 signalling (Schneider et al., 2008), it therefore seemed logical to consider if this was also true of ISX-  
31 9's actions on EEC differentiation. To explore this, we used calcium fluorometry in Fura-2 AM loaded  
32 mouse organoids. ISX-9 induced a long and slow (approx. 15min) increase in mean basal to peak  
33 calcium response in 40% of cells examined (Fig. 5A and Suppl. Fig. 3A-C). All cells including those which  
34 did not respond to ISX-9, produced the expected fast spike in calcium following administration of the

1 positive control ATP (Fig. 5A). Positionally, responders were never found at the base of the crypt buds,  
2 where *Lgr5*<sup>+</sup> stem cells reside, but were present in various positions around and above the +4 position,  
3 and likely within the nominal transit amplifying zone (Suppl. Fig. 3D-F).

4 In neuronal progenitors ISX-9 increases calcium from both extra- and intra- cellular calcium  
5 sources (Schneider et al., 2008). We therefore chose to pharmacologically block ISX-9 induced calcium  
6 responses in organoids using the Calcium Calmodulin Kinase II enzyme inhibitor KN93. CamKII is an  
7 important intracellular calcium signalling node. Interestingly, our single cell data demonstrated the  
8 majority of *Camk2b* expressing cells were restricted to the late *Ngn3* and endocrine progenitor cell  
9 populations and showed a high degree of co-localisation with *Pax4*, particularly in the Late *Ngn3*  
10 progenitors (Suppl. Fig. 3G). When given in conjunction with ISX-9, KN93 dose dependently inhibited  
11 induction of *Ngn3*, *NeuroD1* and *Pax4* whilst KN93's inactive analogue, KN92, did not (Fig. 5B). Blocking  
12 CamKII signalling reduced the effect of ISX-9 on EEC differentiation. The expansion of *Ngn3*<sup>+</sup> and *Cck*<sup>+</sup>  
13 cells was reduced by approximately 30-40% when KN93 was present (Fig. 5C). KN92 did not affect the  
14 expansion of *Cck*<sup>+</sup> cells driven by ISX-9 (Suppl. Fig. 3H). KN93 also attenuated the increase in total  
15 CHGA<sup>+</sup> cells by 50% and mildly but not significantly reduced the total number of 5-HT<sup>+</sup> cells (Fig. 5D-  
16 H). As expected KN93 had little effect on the singly labelled populations of 5-HT<sup>+</sup> and CHGA<sup>+</sup> (Fig. 5E  
17 and F), but inhibited ISX-9 induced expansion of the co-localised population representing endocrine  
18 EC cells (Fig. 5G and H). These data reveal ISX-9 manipulates EEC differentiation in part by producing  
19 a calcium signal, likely in a population of early endocrine destined progenitors.

20

### 21 **Enterochromaffin cell enrichment is replicated in human terminal ileal organoids.**

22 Historically our understanding of mouse EEC differentiation has been based on knockout and  
23 lineage tracing *in vivo* studies, which were low throughput but provided key information regarding  
24 transcriptional regulation of EEC specification. The advent of organoid and single cell technologies has  
25 rapidly expanded our knowledge in this area (Gehart et al., 2019). However, there is a deficit in our  
26 understanding of human epithelial EEC differentiation. Our mouse data identified ISX-9 as a useful tool  
27 to explore features of human EEC differentiation.

28 We began by validating a differentiation protocol in organoids generated from terminal ileal  
29 (TI) biopsies. Organoids were stimulated to differentiate by reducing Wnt signalling for 7 days. This  
30 protocol led to reduced *LGR5* and *LYZ1* but increased *ALPI*, *VIL1* and *MUC2* (Suppl. Fig. 4). As expected,  
31 we observed strong increases in the expression of EEC markers, *NGN3*, *NEUROD1*, *CHGA*, *TPH1*, *GCG*,  
32 *PYY*, *SST*, *GHRL* and *NTS*, suggesting a broad augmentation of the lineage. Interestingly, *CCK* and *TAC1*  
33 were not increased during the differentiation protocol (Suppl. Fig. 4). Next, we designed an ISX-9  
34 protocol for human TI that closely matched our mouse protocol. This consisted of a 3-day baseline



1 period using stem cell media (WENRAS) followed by 7 days in differentiation media. A 48-hr ISX-9  
2 pulse was delivered on day 6 (Fig. 6A). The human TI transcriptional response was remarkably similar  
3 to the mouse. *NGN3*, *NEUROD1* and *PAX4* expression were increased after 48-hr exposure to ISX-9  
4 (Fig. 6B). At the end of the differentiation protocol, *ALPI*, *MUC2* and *LYZ1* expression were reduced  
5 whilst *LGR5* was increased (Fig. 6C). Examination of endocrine markers following the same protocol  
6 revealed that the response to ISX-9 in human intestinal organoids mirrored the mouse. *TAC1*, *TPH1*,  
7 *CHGA* and *CCK* were increased, suggesting enrichment for EC and Cck<sup>+</sup> cells, whilst markers of L cells  
8 (*PYY*, *GCG*), X cell (*GHRL*) and D cells (*SST*) were downregulated (Fig. 6C and D). Immunofluorescent  
9 staining confirmed EC cell enrichment, driven mainly by an expansion of cells expressing both 5-HT<sup>+</sup>  
10 and CHGA<sup>+</sup> (Fig. 6E-G). These new cells were functional, secreting 5-HT into the media following  
11 stimulation (Fig. 6H).

12 Overall our data point to ISX-9 programming endocrine progenitors towards an EC cell fate,  
13 prompting us to speculate whether combining ISX-9 with known stimulators of the whole EEC lineage  
14 would amplify the enrichment of EC cells. To do this, we compared the EEC transcriptional response  
15 between ISX-9; a combination of NOTCH inhibition (iNotch) and MEK inhibition (iMEK); and all three  
16 together. These inhibitors have been shown to drive EEC differentiation by inducing stem cell  
17 quiescence (Basak et al., 2017). ISX-9 and the iNotch, iMEK combination produced differential  
18 transcriptional responses. The inhibitor combination reduced *LGR5* and *LYZ1* expression and as  
19 expected increased *ALPI*, *MUC2*, *NGN3*, *NEUROD1*, *CHGA*, *TPH1*, *TAC1* and *CCK* expression (Suppl. Fig.  
20 5). In comparison the ISX-9 response was characterised by increased *LGR5* and reduced *LYZ1* and *ALPI*.  
21 ISX-9 was equally effective as iNotch and iMEK at increasing *NEUROD1* and *CCK* but produced stronger  
22 increases in *NGN3*, *CHGA*, *TPH1* and *TAC1*, which was expected given its propensity for inducing EC  
23 cell enrichment. In combination the two protocols powerfully and synergistically enriched organoids  
24 for markers of EC cells. Immunofluorescence staining confirmed a dramatic (100-fold) enrichment for  
25 endocrine EC cells (Fig. 6I-K), providing further evidence that ISX-9 programmes early progenitors to  
26 become EC cells.

27

### 28 **Overexpression of *Pax4* in human ileal organoids partially mimics the effect of ISX-9 on EEC** 29 **differentiation.**

30 In our original experiments *Ngn3*, *NeuroD1* and *Pax4* were identified as important  
31 transcription factors responding to ISX-9. Furthermore, at the single cell level our data highlighted a  
32 potential important role of *Pax4* in the Late-Ngn3 and endocrine progenitors which may bias cells  
33 towards an EC cell fate. To explore the role of *Pax4* we generated human TI organoids with a  
34 doxycycline (Dox) inducible *Pax4* overexpressing transgene *Tg(tetO-mPax4-IRES-mCherry)::Tg(CMV-*

1 *rtTA*), using a piggyBAC system (Fig. 7A). We overexpressed mouse *Pax4*, which is 85% homologous to  
2 human *PAX4*, so that we could distinguish between endogenous and transgenic *PAX4*.

3 Dox treatment induced RFP expression within 24 hours (Suppl. Fig. 6A, Suppl. Movie 1)  
4 correlating with a 120-fold increase in mouse *Pax4* expression, further increasing by 500-fold after 48  
5 hours (*Pax4<sup>Hi</sup>*) (Suppl. Fig. 6B). Doxycycline inducible transgenes have been documented to be mildly  
6 leaky (Zhu et al., 2001). Indeed, our transgenic untreated organoids exhibited a low but significant  
7 level of *Pax4* expression (3-fold) (*Pax4<sup>Lo</sup>*) compared to genetically identical wild-type controls  
8 maintained at the same passage. Fortuitously, the level of leaky expression was similar in magnitude  
9 to the induction by ISX-9 (Fig. 5B). This afforded us the opportunity to examine *Pax4* gene dosage on  
10 EEC differentiation. We mirrored our ISX-9 protocol by using a 3-day baseline followed by a 7-day  
11 differentiation period and gave a pulse of Dox for 48 hours on day 6. Selected transcriptional markers  
12 of epithelial cell types and EEC markers were analysed on day 10 (48 hrs after removal of Dox) (Fig.  
13 7B). In parallel with transgenic *Pax4* expression, endogenous *PAX4* expression was also increased, 3-  
14 fold in untreated and 100-fold in Dox treated organoids, suggesting the existence of *Pax4* self-  
15 regulating pathways.

16 *Pax4<sup>Lo</sup>* had no effect on *LGR5*, *LYZ1*, *VIL1* or *ALPI* expression but significantly increased *MUC2*  
17 expression compared to the wild type control suggesting increased goblet differentiation (Suppl. Fig.  
18 6C). *NGN3* and *NEUROD1* expression were both significantly increased as were *CHGA* and *TPH1* (EC  
19 cells), *CCK* (I cells), *PYY* (L cells), *NTS* (N cells), *GHRL* (G cells) and *SST* (D cells) whilst *GCG* (L cells), *TAC1*  
20 (early EC cells), *GIP* (K cells) were unchanged compared to wild type (Fig. 7B and Suppl. Fig. 7A),  
21 suggesting low levels of *Pax4* overexpression induced selective specification of particular EEC subtypes  
22 including EC cells, partly mimicking the effect of ISX-9, but also inducing markers of N (*NTS*), D (*SST*)  
23 and X (*GHRL*) cells.

24 *Pax4<sup>Hi</sup>* significantly increased *LGR5*, *LYZ1* and *VIL1* whilst reducing *ALPI* and having no effect  
25 on *MUC2* (Suppl. Fig. 6C). Unexpectedly, compared to Dox negative transgenic controls, *Pax4<sup>Hi</sup>* did not  
26 enhance EEC specification, despite a 13-fold increase in *NGN3* expression (Fig. 7B). In fact, the  
27 opposite was evident; all other EEC markers (*NEUROD1*, *CHGA*, *TPH1*, *NTS*, *PYY*, *CCK*, *GHRL*, *GCG*, *SST*  
28 and *GIP*) were either strongly reduced or undetectable (Fig. 7B and Suppl. Fig. 7A), except for *TAC1*  
29 which was increased by 2-fold (Fig. 7B).

30 This suggested EEC differentiation was stalled by high expression of *Pax4*. To investigate this  
31 further, we measured transcriptional markers on day 12 of our protocol, 96 hrs following removal of  
32 Dox. At this time point, *Pax4<sup>Hi</sup>* expression was reduced from 94-fold to a 3-fold induction (Fig. 7C).  
33 Accordingly, endogenous *PAX4* induction was halved in the *Pax4* Hi group, demonstrating *Pax4*  
34 expression was rapidly induced by Dox but was relatively slow to down-regulate following Dox

1 removal. Elevated *NGN3* expression was reduced from 13-fold to 2-fold and *NEUROD1* was no longer  
2 suppressed (Fig. 7C). This was associated with normalisation of *TAC1* expression and a disinhibition of  
3 EC cell markers (*CHGA* and *TPH1*) (Fig. 7C). All other endocrine markers (*CCK*, *SST*, *NTS*, *GHRL*, *GCG*,  
4 *PYY* and *GIP*) remained suppressed (Fig. 7C and Suppl. Fig. 7B). These data suggest low levels of *Pax4*  
5 expression enhance EEC specification but high levels trap EECs in an early progenitor state with an  
6 enterochromaffin cell bias. As *Pax4* expression normalises, endocrine differentiation proceeds with  
7 the appearance of EC cells. This helps explain ISX-9's effects on EC cell enrichment and suggest  
8 upregulation of *PAX4* and *TAC1* are important.

9

## 10 **Discussion**

11 Enteroendocrine cells respond to diverse signals in the luminal environment including nutrients,  
12 microbial metabolites and pathogens. They play a central role in integrating these complex signals and  
13 altering physiology by modulating epithelial, immune, neuronal and hormonal functions. These  
14 features make the enteroendocrine system a potential target for treating multiple conditions, notably  
15 attention has focused on metabolic diseases (Sam et al., 2012). An increasingly important feature of  
16 EECs is their plasticity, which hypothetically could be appropriated to alter their density and/or  
17 functional characteristics for therapeutic gain (Tsakmaki A, 2017). This is exemplified by two studies,  
18 which increased the secretory lineage *in vivo* using either a Notch or Rho-associated coiled-coil-  
19 containing protein kinase (ROCK) inhibitor (Petersen et al., 2018; Petersen et al., 2015). The increased  
20 EEC density included GLP-1-producing L cells, promoting glucose control and reducing hyperglycaemia  
21 in models of diabetes. The caveat to these proof of principle studies is their broad effect across the  
22 secretory lineage. Targeting specific EEC differentiation pathways might be a more suitable approach  
23 but requires a deeper understanding of the regulatory networks controlling EEC specification,  
24 particularly in the human epithelium, which had been difficult to study before the advent of organoid  
25 technology.

26 We used ISX-9, a small molecule activator of *NeuroD1*, to further investigate EEC  
27 differentiation in mouse and human intestinal organoids. In the gut, *NeuroD1* is downstream of *Ngn3*  
28 in endocrine progenitors and its deletion reduces the number of CCK and secretin cells in mice  
29 (Schonhoff et al., 2004a), potentially offering the opportunity to modulate specific EEC cell fates using  
30 ISX-9. Indeed, in our initial experiments ISX-9 strongly increased classical TFs known to be key  
31 members of the regulator network controlling EEC differentiation (*Ngn3*, *NeuroD1* and *Pax4*), but did  
32 not affect *Arx*, suggesting specificity. Analysis of organoids derived from transgenic reporter mice or  
33 immunostained for serotonin, revealed ISX-9 increased markers of endocrine progenitor development  
34 and demonstrated an enrichment of functionally terminally differentiated EC cells. At single cell

1 resolution we were able to corroborate the presence of two major developmental endocrine  
2 trajectories, peptidergic (gut hormone) versus enterochromaffin and identify developmentally earlier  
3 endocrine clusters. Analysis of ISX-9 treated cells provided evidence of increased cells in the endocrine  
4 branch at the expense of the non-endocrine goblet/enterocyte lineages. A notable increase of Pax4  
5 expression in the Late-Ngn3 population coupled with an activation of a genetic program biased  
6 towards EC differentiation could explain the enrichment in functional EC cells. Importantly, this  
7 appeared to be a genuine manipulation of lineage fate and not an alteration in organoid growth.  
8 Equally, organoid proliferation and *Lgr5* expression were unaltered, in contrast to a previously  
9 published paradigm which promotes EEC lineage differentiation by inducing *Lgr5* stem cell quiescence  
10 using NOTCH and MEK inhibitors (Basak et al., 2017).

11 The triggering of neuronal differentiation by ISX-9 is calcium dependent (Schneider et al.,  
12 2008). Similarly, its effect on the endocrine lineage was partly dependent on calcium signalling.  
13 Inhibition of the intracellular calcium signalling node, CamKII, attenuated EC and *Cck<sup>+</sup>* cell enrichment  
14 and blocked induction of *Ngn3*, *NeuroD1* and *Pax4* expression. This chimes with recent data in  
15 *Drosophila*, showing activation of the mechanosensitive receptor Piezo in a population of mid-gut  
16 endocrine progenitor cells increases EEC differentiation through cytosolic Ca<sup>2+</sup> (He et al., 2018). In  
17 mice, Piezo2 is found in a sub-population of EC cells which release serotonin in response to stretch  
18 (Alcaino et al., 2018). Future work will be aimed at identifying in which cells ISX-9 stimulates calcium  
19 and whether calcium signalling is an important regulator of homeostatic endocrine differentiation in  
20 the gut.

21 Most data relating to EEC differentiation has been gathered in mice or using mouse tissues.  
22 Comparatively little is known about the networks controlling endocrine cell fate in the human gut  
23 epithelium, but they are assumed to be conserved to some degree, stemming largely from the study  
24 of patients with mutations in *NGN3* who exhibit intractable malabsorptive diarrhoea due to loss of  
25 EECs and a handful of recent studies in organoids (German-Diaz et al., 2017; Pinney et al., 2011; Rubio-  
26 Cabezas et al., 2011). In these *in vitro* studies, a pulse of transgenic *NGN3* in iPSCs-derived human  
27 organoids mostly recapitulated the predicted endocrine repertoire (Sinagoga et al., 2018). The same  
28 transgenic construct has been deployed in organoids derived from tissue resident stem cells and  
29 similarly promoted EEC differentiation (Chang-Graham et al., 2019). Our data shed further light on  
30 human EEC differentiation and its similarity to mouse. Notably, ISX-9 produced identical effects on  
31 the EEC lineage between species. *NGN3*, *NEUROD1* and *PAX4* up-regulation was associated with  
32 selective increases in *CCK*, *CHGA*, *TPH1* and *TAC1*. Whole organoid immunostaining confirmed  
33 enrichment for EC cells double positive for 5-HT and CHGA and these cells functionally released 5-HT.  
34 Our data have several implications; they highlight how similar EEC specification is between mouse and

1 human and that ISX-9 alone or in combination with iNotch and iMEK can be used to enrich human  
2 organoids with EC cells allowing functional exploration of these rare and difficult to study cells. EC cells  
3 modulate GI motility, bone formation, hepatic gluconeogenesis, thermogenesis, insulin resistance,  
4 and regulation of fat mass (Yabut et al., 2019). Understanding how these cells function in the human  
5 has important implications.

6 Our data highlighted the potential importance of *Pax4*, its induction in the late Ngn3  
7 population seemed to offer a developmentally early mechanistic explanation for EC cell enrichment  
8 by ISX-9. However, low level constitutive expression produced a generalised increase in EEC lineage  
9 markers, notable exceptions were *GCG* and *GIP*. We also observed a surprising and powerful  
10 upregulation of *NGN3*, suggesting reciprocal regulation between *PAX4* and *NGN3*. The upregulation  
11 of *MUC2* and *LYZ1* might also be explained by this *NGN3* upregulation, as 15% of goblet and 40% of  
12 Paneth cells are derived from Ngn3 progenitors (Schonhoff et al., 2004b). Strikingly, induction of high  
13 levels of *Pax4* expression completely inhibited endocrine differentiation, trapping EEC differentiation  
14 at an early stage. Unexpectedly, induced transgenic *Pax4* was persistent remaining upregulated by 3-  
15 fold 96 hours after doxycycline removal, although this was reduced from a peak induction of 94-fold.  
16 Interestingly, at this time point all markers of peptidergic EECs (*CCK*, *SST*, *NTS*, *GHRL*, *GCG* and *PYY*)  
17 remained suppressed, but markers of mature EC cells (*CHGA* and *TPH1*) were now disinhibited, and  
18 *TAC1*, an early EC cell marker, was no longer upregulated. We drew several conclusions from this.  
19 Firstly, our data are consistent with the existence of two major lineages of EECs in the human, as  
20 recently described in the mouse and corroborated by our single cell data (Gehart et al., 2019; Julie  
21 Piccand, 2019). One lineage giving rise to an early appearing EC cell population and the other to  
22 peptidergic producing cells, which generally appear later than EC cells. Secondly, *PAX4*, as in the  
23 mouse, is upstream of *NEUROD1* and likely marks an early endocrine progenitor cell. Thirdly,  
24 understanding the network of TFs controlling EEC differentiation is complicated by their promiscuity  
25 and the need to appreciate the timing and level of expression. Lastly, it seems plausible that ISX-9  
26 enriches the ECC lineage in part by its effects on *PAX4* expression which may represent an increase in  
27 the endocrine pool biased towards an EC cell fate.

28 Finally, our data add to a handful of studies suggesting small molecules could be found to  
29 selectively control EEC cell fate/specification with a view to treat various clinical conditions. However,  
30 our data also highlight the difficulties this approach faces. Understanding to what degree the targeted  
31 lineage creates a deficit in another and whether this induces unwanted physiological effects, is of key  
32 importance. This seems a likely event when intervening downstream of *NGN3*, where one EEC type  
33 may be enriched at the expense of another. This could be mitigated by combining selective EEC

1 targeting with a more generalised EEC lineage activator. Realising this potential will require a much  
2 deeper understanding of human EEC lineage specification aided by the organoid platform.

3

#### 4 **Acknowledgements**

5 For providing us with intestinal tissues from transgenic animals for the generation of small intestinal  
6 organoids we would like to thank Prof Anne Grappin-Botton (Neurog3-RFP mice), Dr Mathieu Latreille  
7 (*Tg(Neurog3-cre)C1Able/J::R26-loxSTOPlox-tdRFP* mice) and Dr Giuseppe D'Agostino (*CCK-iCre::R26-*  
8 *loxSTOPlox-eYFP* mice). We would also like to thank Dr Calvin Kuo and Dr Hans Clever for providing us  
9 with R-Sponding1-producing cell line and L-Wnt3A cells, respectively, and Dr Bon-Kyoung Koo for  
10 supplying the piggyBAC system for the generation of doxycycline induced Pax4/RFP overexpressing  
11 human ileal organoids. Finally, we would like to thank the staff in the Nikon Imaging Centre and in BRC  
12 Flow cytometry core at King's College London for all their help.

13

#### 14 **Conflict of interests**

15 The authors have no conflict of interest to disclose

16

#### 17 **Author contributions**

18 A. T. and P. F. P. helped in the design of experiments, collected data and contributed to the writing of  
19 the manuscript. P.P and B.H.H provided human biopsies for the isolation of crypts. G. A. B. wrote the  
20 manuscript and managed the project.

21

#### 22 **Figure Legends**

23

24 **Figure 1: Effects of ISX-9 on the expression of transcription factors associated with EEC**  
25 **differentiation.** (A-F) Expression of *NeuroD1* (A), *Ngn3* (B), *Pax4* (C), *Arx* (D), *Atoh1* (E) and *Hes1* (F) in  
26 mouse intestinal organoids cultured in the presence of increasing doses of ISX-9 (2  $\mu$ M-80  $\mu$ M) for 48  
27 hrs. (G-I) Expression of *Ngn3* (G), *NeuroD1* (H) and *ChgA* (I) in mouse organoids after 24 hrs, 48 hrs  
28 and 96 hrs continuous exposure to 40  $\mu$ M ISX-9. (J) Schematic diagram explaining our experimental  
29 paradigm (K) Expression of *Ngn3* and *NeuroD1* in mouse intestinal organoids following our  
30 experimental paradigm. Data are represented as mean  $\pm$  SEM. One-way ANOVA with Dunnett post  
31 hoc test (A-F), unpaired two-tailed Student's t test (G-I, K).

32

33 **Figure 2: ISX-9 does not affect mouse intestinal organoid growth and specifically enriches markers**  
34 **of EC cells.** (A) Representative brightfield images of mouse small intestinal organoids following the 48-



1 hr ISX-9 pulse protocol. Surface area (B), perimeter (C) and number of buds (D) per control and treated  
2 organoids. (E-F) Proliferating cells in control and ISX-9 treated organoids were visualized by the  
3 incorporation of 5-ethynyl-2'-deoxyuridine (EdU) (white) and counterstain with Hoechst (blue) (E).  
4 Number of Edu<sup>+</sup> cells were counted for control and ISX-9 treated organoids on day 5 (at the end of 48-  
5 hr ISX-9 treatment) and on day 7 (48 hrs after removal of ISX-9) (F). (G-H) qPCR analysis of lineage  
6 markers (G) and enteroendocrine specific markers (H) in control and 48-hr ISX-9 pulse treated  
7 organoids. Brightfield images are shown as one middle plain field of the organoid.  
8 Immunofluorescence images are shown as maximum intensity projections of a z-stack through the  
9 organoid. Scale bar: 50µm. Data are represented as mean ± SEM, except in violin plots, where data  
10 are presented as median and quartiles. Unpaired two-tailed Student's t test (B, C, F), one way-ANOVA  
11 with Holms-Sidak multiple comparisons post hoc test (G and H). Kruskal-Wallis test with Dunn's post  
12 hoc test (D).

13

14 **Figure 3: ISX-9 increases *Ngn3* endocrine fated populations with a bias toward EC cells.**

15 Intestinal organoids derived from *Ngn3*-RFP had a 48-hr ISX-9 treatment or left untreated.  
16 Immediately after treatment fluorescently labelled cells were sorted for further analysis. (A) Flow  
17 cytometric scatter plots of control vs. treatment and percentage of RFP<sup>+</sup> cells recovered (Unpaired  
18 two-tailed Student's t test). (B) Combined expression heatmap of top 10 conserved marker genes  
19 between control and treated cells for each cluster. (C) UMAP projection depicting clusters identified  
20 by conserved marker expression between control and treatment. (D) UMAP projection of clusters split  
21 by treatment. (E) Dot plot of transcription factors known to influence endocrine and EC cell fate  
22 comparing control versus treatment across clusters. Size of dot represents percentage of cells positive  
23 for gene within cluster, intensity of dot represents average expression of gene within cluster. (F) Violin  
24 plots of average *Neurog3*, *Pax4*, *Fev*, *Hmgn3* expression by cluster and treatment. (G) UMAP  
25 projections of *Pax4* expression comparing control vs. treatment. \* = adj. p value for *Neurog3* (0.01),  
26 *Pax4* (late *Ngn3* = 0.04, Endocrine prog = 0.0015), *Fev* (0.015), *Hmgn3* (0.03).

27

28 **Figure 4: ISX-9 increases the number of *Ngn3*<sup>+</sup> endocrine progenitors and enriches mouse intestinal  
29 organoids with and functional enterochromaffin cells.**

30 (A) Experimental design schematic. The number of RFP<sup>+</sup> cells in *Ngn3*-Cre-RFP mouse intestinal organoids treated with a 48-hr ISX-9 pulse, was  
31 increased in comparison with controls as shown by flow cytometric analysis (B) and by counting from  
32 live-imaging (n=26) (C). (D) Expression levels of *Ngn3*, *NeuroD1*, *Muc2*, *Lyz1* and *ChgA* in RFP<sup>+</sup> cells  
33 sorted from *Ngn3*-Cre-RFP mouse intestinal organoids. (E) Confocal images of double  
34 immunofluorescent staining of for CHGA (green) and 5-HT (red). (F-H) Quantification of singly labelled

1 CHGA+ and 5-HT+ cells (F and G), and cells which co-localised these antigens (H) (n=53-58). (I) 5-HT  
2 content and release measured by enzyme-linked immunosorbent assay (ELISA)(n=8). (K)  
3 Quantification of GLP-1<sup>+</sup> cells (n=18). Live-cell images are shown as one middle plain for brightfield  
4 and as maximum intensity projections of a z-stack for RFP. Immunofluorescence images are shown as  
5 maximum intensity projections of a z-stack. Scale bar: 50µm. All data are represented as mean ± SEM,  
6 except in violin plots where data are presented as median and quartiles. Unpaired two-tailed Student's  
7 t test.

8

9 **Figure 5: Enterochromaffin cell enrichment is partly dependent on ISX-9 induced calcium signalling.**

10 (A) Live-cell imaging of intracellular calcium in mouse small intestinal organoids using fluorescent  
11 indicator Fura-2 AM. Representative temporal plots of [Ca<sup>2+</sup>]<sub>i</sub> changes are shown, expressed as  
12 F340/380, in responsive cells (left) and non-responsive cells (middle) upon exposure to 40 µM ISX-9,  
13 followed by 100 µM ATP. Pie chart (right) shows the proportions of cells responsive to 40 µM ISX-9 (2  
14 individual experiments). (B) Expression of *Ngn3*, *NeuroD1* and *Pax4* in mouse organoids after 48-hr  
15 exposure to 40 µM ISX-9 in the presence of increasing doses of KN93 (top panel) or (KN92) (bottom  
16 panel). (C) Flow cytometric analysis of Ngn3<sup>+</sup> and CCK<sup>+</sup> cells from Ngn3-Cre-RFP and CCK-Cre-eYFP  
17 organoids respectively, in the presence or absence of ISX-9, KN93, or combination of both, for 48 hrs.  
18 Data are representative of a single experiment with n=3. (D) Images of double immunofluorescent  
19 staining of control and ISX-9, KN93 or combination of both treated organoids for CHGA (green) and 5-  
20 HT (red). (E-G) Quantification of total 5-HT<sup>+</sup> (E), total CHGA<sup>+</sup> cells (F), and cells which co-localised these  
21 antigens (G) in control and ISX-9 and KN93 treated organoids. (H) Quantification of singly labelled 5-  
22 HT<sup>+</sup>, CHGA<sup>+</sup> cells and co-localised cells (n=59-64). All confocal images are shown as maximum intensity  
23 projection of a z-stack. Scale bar: 50µm. Data are represented as mean ± SEM, except in violin plots  
24 where data are presented as median and quartiles. One-way ANOVA with Sidak's post hoc test. (H)  
25 CHGA - CON vs ISX-9, p=0.1574; ISX-9 vs ISX-9+KN93, p=0.3217; CON vs ISX-9+KN93, p=0.9714. 5-HT -  
26 CON vs ISX-9, p=0.9878; ISX-9 vs ISX-9+KN93, p=0.1733; CON vs ISX-9+KN93, p=0.0913. Co-localisation  
27 - CON vs ISX-9, p<0.0001; ISX-9 vs ISX-9+KN93, p=0.0118; CON vs ISX-9+KN93, p<0.0001.

28

29 **Figure 6: Effects of ISX-9 on human terminal ileal organoids.** (A) Schematic diagram explaining the  
30 experimental paradigm of 48-hr ISX-9 pulse in human TI organoids. (B) Expression of *NGN3*, *NEUROD1*  
31 and *PAX4* in human TI organoids after 48 hrs exposure to 40 µM ISX-9. qPCR analysis of lineage markers  
32 (C) and enteroendocrine specific markers (D) in control and 48-hr ISX-9 pulse treated human TI  
33 organoids. (E) Confocal images of double immunofluorescent staining human TI organoids for CHGA  
34 (green) and 5-HT (red). (F) Quantification of total 5-HT<sup>+</sup> and total CHGA<sup>+</sup> cells. (G) Quantification of  
35 singly labelled 5-HT<sup>+</sup> cells and CHGA<sup>+</sup> cells and cells which co-localise these antigens human organoids

1 (n=25). (H) 5-HT release from human TI organoids as measured by ELISA. (I) Quantification of total 5-  
2 HT<sup>+</sup> and total CHGA<sup>+</sup> cells in control human TI organoids and in organoids treated with ISX-9, a  
3 combination of iNotch and iMEK, and all three together. (J) Quantification of singly labelled 5-HT<sup>+</sup> cells,  
4 CHGA<sup>+</sup> cells and cells which co-localised these antigens (n=15-21). (K) Confocal images of double  
5 immunofluorescent staining of human TI organoids for CHGA (green) and 5-HT (red). All confocal  
6 images are shown as maximum intensity projections of a z-stack. Scale bar: 50µm. Data are  
7 represented as mean ± SEM, except in violin plots where data are presented as median and quartiles.  
8 Unpaired two-tailed Student's t test (F- H). One way-ANOVA with Holms-Sidak multiple comparisons  
9 post hoc test (B-D, I and J): (J) CHGA – CON vs ISX-9, p=0.4473, ISX-9 vs iN+iM, pp=0.1062; CON vs  
10 iN+iM, p=0.0027; iN+iM vs iN+iM+ISX-9, p<0.0001. 5-HT – CON vs ISX-9, p=0.9216, ISX-9 vs iN+iM,  
11 pp=0.0006; CON vs iN+iM, p=0.0035; iN+iM vs iN+iM+ISX-9, p=0.1079. Co-localisation – CON vs ISX-9,  
12 p=0.0213, ISX-9 vs iN+iM, pp=0.9683; CON vs iN+iM, p=0.0597; iN+iM vs iN+iM+ISX-9, p<0.0001.

13

14 **Figure 7: Overexpression of Pax4 in human ileal organoids.** (A) Schematic describing the production  
15 pipeline for the generation of Pax4 overexpressing human ileal organoids. (B-C) Expression of mouse  
16 Pax4, human PAX4, NGN3, NEUROD1, EC cell (CHGA, TPH1, TAC1) and I cell (CCK) markers in wild type  
17 untreated organoids (WT), wild type organoids induced for 48 hrs with 1 µg/ml Doxycycline (WT +  
18 Dox), transgenic untreated Pax4 human intestinal organoids ( Pax4 OX) and transgenic Pax4 human  
19 intestinal organoids induced for 48 hrs with 1 µg/ml Doxycycline (Pax4 OX + Dox) that collected for  
20 RNA extraction 48 hrs (B) or 96 hrs (C) after removal of Dox. One-way ANOVA with Tukey's post hoc  
21 test.

22

23 **Supplementary Figure 1: Extended single cell analysis, Related to Figure 3.** (A) Violin plots of  
24 archetypal gene expression for the 9 clusters identified in Fig. 3C. (B) Average gene expression for  
25 transcription factors involved in EEC differentiation (*NeuroD1, Nkx2.2, Rfx6, Prdm16, Isl1, Arx*) focusing  
26 on endocrine clusters and split by treatment (CON, 40 µM ISX-9).

27

28 **Supplementary Figure 2: ISX-9 increases the number of Ngn3<sup>+</sup> endocrine progenitors and enriches**  
29 **mouse intestinal organoids with CCK-expressing cells, Related to Figure 4.** (A) Expression levels of  
30 *Ngn3, NeuroD1, Muc2, Lyz1* and *ChgA* in RFP<sup>+</sup> cells sorted from Ngn3-Cre-RFP mouse intestinal  
31 organoids treated with or without ISX-9 for 48 hrs. 48-hr ISX-9 pulse increased the number of eYFP<sup>+</sup>  
32 cells in CCK-Cre-eYFP intestinal organoids as shown by live-cell imaging (B-C) and by flow cytometry  
33 (D). (B) Live-cell fluorescence microscopy images of control and ISX-9 treated CCK-Cre-eYFP intestinal  
34 organoids. eYFP labels CCK<sup>+</sup> cells (I cell) (n=24). (C) quantification of (B). Live-cell images are shown as

1 one middle plain for brightfield and as maximum intensity projections of a z-stack for eYFP. Scale bar:  
2 50µm. All data are represented as mean ± SEM, except in violin plots where data are presented as  
3 median and quartiles. Unpaired two-tailed Student's t test.

4

5 **Supplementary Figure 3: Enterochromaffin cell enrichment is partly dependent on ISX-9 induced**  
6 **calcium signalling, Related to Figure 5.** (A) Live-cell imaging of intracellular calcium in mouse small  
7 intestinal organoids using fluorescent indicator Fura-2 AM. Representative temporal plots of [Ca<sup>2+</sup>]<sub>i</sub>  
8 changes (expressed as F340/380) in 8 regions of interest corresponding to responsive cells (A) and 23  
9 regions of interest corresponding to non-responsive cells (B) upon exposure to 40 µM ISX-9, followed  
10 by 100 µM ATP. (C) Mean peak amplitude of cells responsive and non-responsive to 40 µM ISX-9  
11 (Unpaired two-tailed Student's t test). (D) Image of Fura-2 AM ratio (F340/380) shown in  
12 pseudocolour, before start of experiment. (E) Regions of interest selected on bud 1. (F) Regions of  
13 interested selected on bud 2. (G) UMAP projections showing Pax4- (blue), CamK2b- (red) expressing  
14 cells and co-localised cells (purple) preferentially expressed in the late Ngn3 and endocrine progenitor  
15 clusters. (H) Flow cytometric analysis of CCK<sup>+</sup> cells from CCK-Cre-eYFP organoids treated with ISX-9,  
16 KN92 or combination of both 48 hrs. Data are representative of a single experiment with n=3. All flow  
17 plots show the gating and present both positive and negative sorted populations (One-way ANOVA  
18 with Sidak's post hoc test).

19

20 **Supplementary Figure 4: Characterization of human TI organoids.** Expression of lineage markers  
21 (*LGR5*-marker for stem cells, *LYZ1*-marker for Paneth cells, *VIL1*-a general epithelial marker, *ALPI*-  
22 marker of enterocytes, *MUC2* -marker for goblet cells), enteroendocrine specific markers (*CCK*-marker  
23 for I cells, (*CHGA*, *TPH1*, *TAC1*)-markers for EC cells, (*PYY*, *GCG*)-markers of L cells, *GIP*-marker of K cells,  
24 *GHRL*-marker of X cells, *NTS*-marker of N cells, *SST*-marker of D cells) and the TFs, *NGN3* and *NEUROD1*,  
25 in human TI organoids cultured in stem cell and differentiation medium. Unpaired two-tailed Student's  
26 t test.

27

28 **Supplementary Figure 5: Transcriptional responses of ISX-9 combined with iNotch and iMEK in**  
29 **human terminal ileal organoids, Related to Figure 6.** qPCR analysis of lineage markers (*VIL1*, *LGR5*,  
30 *LYZ1*, *ALPI*, *MUC2*), TFs (*NGN3*, *NEUROD1*) and EC cell (*CHGA*, *TPH1*, *TAC1*) and I cell (*CCK*) markers in  
31 human TI organoids treated with 40 µM ISX-9, a combination of 500 nM PD0325901 (inhibition of  
32 MEK signalling-iMEK) and 10 µM DAPT ( inhibition of Notch signalling-iNotch), or a combination of all  
33 three ( ISX9+ iNotch iMEK) for a 48-hr pulse. One-way ANOVA with Sidak's post hoc test.

34

1 **Supplementary Figure 6: Further characterization of human ileal organoids overexpressing *Pax4*,**  
2 **related to Figure 7.** (A) Time-lapse video showing the induction of RFP expression in transgenic *Pax4*  
3 human intestinal organoids with 1 µg/ml Doxycycline within 24 hours (left) which correlated with a  
4 120-fold increase in mouse *Pax4* expression (right). (B) Quantification of mouse *Pax4* expression after  
5 treatment with 1 µg/ml Doxycycline for 48h (C) qPCR analysis of lineage markers (*LGR5*, *LYZ1*, *VIL1*,  
6 *ALPI*, *MUC2*) in wild type untreated organoids (WT), wild type organoids induced for 48 hrs with 1  
7 µg/ml Doxycycline (WT + Dox), transgenic untreated *Pax4* human intestinal organoids ( *Pax4* OX) and  
8 transgenic *Pax4* human intestinal organoids induced for 48 hrs with 1 µg/ml Doxycycline (*Pax4* OX +  
9 Dox). Samples were collected for RNA extraction 48 hrs after removal of Dox. One-way ANOVA with  
10 Sidak's post hoc test.

11

12 **Supplementary Figure 7: Further characterization of human ileal organoids overexpressing *Pax4*,**  
13 **Related to Figure 7.** Expression of EEC markers *SST*, *NTS*, *GHRL*, *GCG*, *PYY*, and *GIP* in wild type  
14 untreated organoids (WT), wild type organoids induced for 48 hrs with 1 µg/ml Doxycycline (WT +  
15 Dox), transgenic untreated *Pax4* human intestinal organoids ( *Pax4* OX) and transgenic *Pax4* human  
16 intestinal organoids induced for 48 hrs with 1 µg/ml Doxycycline (*Pax4* OX + Dox), collected for RNA  
17 extraction 48 hrs (A) or 96 hrs (B) after removal of Dox. One-way ANOVA with Sidak's post hoc test.

18

## 19 **References**

20 Adriaenssens, A., Lam, B.Y., Billing, L., Skeffington, K., Sewing, S., Reimann, F., and Gribble, F. (2015).  
21 A Transcriptome-Led Exploration of Molecular Mechanisms Regulating Somatostatin-Producing D-  
22 Cells in the Gastric Epithelium. *Endocrinology* *156*, 3924-3936.

23 Alcaino, C., Knutson, K.R., Treichel, A.J., Yildiz, G., Strege, P.R., Linden, D.R., Li, J.H., Leiter, A.B.,  
24 Szurszewski, J.H., Farrugia, G., et al. (2018). A population of gut epithelial enterochromaffin cells is  
25 mechanosensitive and requires Piezo2 to convert force into serotonin release. *Proc Natl Acad Sci U S*  
26 *A* *115*, E7632-E7641.

27 Basak, O., Beumer, J., Wiebrands, K., Seno, H., van Oudenaarden, A., and Clevers, H. (2017). Induced  
28 Quiescence of *Lgr5*+ Stem Cells in Intestinal Organoids Enables Differentiation of Hormone-  
29 Producing Enteroendocrine Cells. *Cell stem cell* *20*, 177-190 e174.

30 Beucher, A., Gjernes, E., Collin, C., Courtney, M., Meunier, A., Collombat, P., and Gradwohl, G.  
31 (2012). The homeodomain-containing transcription factors *Arx* and *Pax4* control enteroendocrine  
32 subtype specification in mice. *PLoS One* *7*, e36449.

- 1 Beumer, J., Artegiani, B., Post, Y., Reimann, F., Gribble, F., Nguyen, T.N., Zeng, H., Van den Born, M.,  
2 Van Es, J.H., and Clevers, H. (2018). Enteroendocrine cells switch hormone expression along the  
3 crypt-to-villus BMP signalling gradient. *Nature cell biology* 20, 909-916.
- 4 Chang-Graham, A.L., Danhof, H.A., Engevik, M.A., Tomaro-Duchesneau, C., Karandikar, U.C., Estes,  
5 M.K., Versalovic, J., Britton, R.A., and Hyser, J.M. (2019). Human Intestinal Enteroids With Inducible  
6 Neurogenin-3 Expression as a Novel Model of Gut Hormone Secretion. *Cell Mol Gastroenterol*  
7 *Hepatol* 8, 209-229.
- 8 D'Agostino, G., Lyons, D.J., Cristiano, C., Burke, L.K., Madara, J.C., Campbell, J.N., Garcia, A.P., Land,  
9 B.B., Lowell, B.B., Dileone, R.J., et al. (2016). Appetite controlled by a cholecystokinin nucleus of the  
10 solitary tract to hypothalamus neurocircuit. *eLife* 5.
- 11 Desai, S., Loomis, Z., Pugh-Bernard, A., Schrunk, J., Doyle, M.J., Minic, A., McCoy, E., and Sussel, L.  
12 (2008). Nkx2.2 regulates cell fate choice in the enteroendocrine cell lineages of the intestine.  
13 *Developmental biology* 313, 58-66.
- 14 Dioum, E.M., Osborne, J.K., Goetsch, S., Russell, J., Schneider, J.W., and Cobb, M.H. (2011). A small  
15 molecule differentiation inducer increases insulin production by pancreatic beta cells. *Proc Natl Acad*  
16 *Sci U S A* 108, 20713-20718.
- 17 Engelstoft, M.S., Lund, M.L., Grunddal, K.V., Egerod, K.L., Osborne-Lawrence, S., Poulsen, S.S.,  
18 Zigman, J.M., and Schwartz, T.W. (2015). Research Resource: A Chromogranin A Reporter for  
19 Serotonin and Histamine Secreting Enteroendocrine Cells. *Mol Endocrinol* 29, 1658-1671.
- 20 Farin, H.F., Van Es, J.H., and Clevers, H. (2012). Redundant sources of Wnt regulate intestinal stem  
21 cells and promote formation of Paneth cells. *Gastroenterology* 143, 1518-1529 e1517.
- 22 Flak, J.N., Patterson, C.M., Garfield, A.S., D'Agostino, G., Goforth, P.B., Sutton, A.K., Malec, P.A.,  
23 Wong, J.T., Germani, M., Jones, J.C., et al. (2014). Leptin-inhibited PBN neurons enhance responses  
24 to hypoglycemia in negative energy balance. *Nat Neurosci* 17, 1744-1750.
- 25 Fre, S., Huyghe, M., Mourikis, P., Robine, S., Louvard, D., and Artavanis-Tsakonas, S. (2005). Notch  
26 signals control the fate of immature progenitor cells in the intestine. *Nature* 435, 964-968.
- 27 Fujii, M., Matano, M., Nanki, K., and Sato, T. (2015). Efficient genetic engineering of human intestinal  
28 organoids using electroporation. *Nat Protoc* 10, 1474-1485.



- 1 Gehart, H., and Clevers, H. (2019). Tales from the crypt: new insights into intestinal stem cells. *Nat*  
2 *Rev Gastroenterol Hepatol* *16*, 19-34.
- 3 Gehart, H., van Es, J.H., Hamer, K., Beumer, J., Kretschmar, K., Dekkers, J.F., Rios, A., and Clevers, H.  
4 (2019). Identification of Enteroendocrine Regulators by Real-Time Single-Cell Differentiation  
5 Mapping. *Cell* *176*, 1158-1173 e1116.
- 6 German-Diaz, M., Rodriguez-Gil, Y., Cruz-Rojo, J., Charbit-Henrion, F., Cerf-Bensussan, N.,  
7 Manzanares-Lopez Manzanares, J., and Moreno-Villares, J.M. (2017). A New Case of Congenital  
8 Malabsorptive Diarrhea and Diabetes Secondary to Mutant Neurogenin-3. *Pediatrics* *140*.
- 9 Gradwohl, G., Dierich, A., LeMeur, M., and Guillemot, F. (2000). neurogenin3 is required for the  
10 development of the four endocrine cell lineages of the pancreas. *Proc Natl Acad Sci U S A* *97*, 1607-  
11 1611.
- 12 Gribble, F.M., and Reimann, F. (2016). Enteroendocrine Cells: Chemosensors in the Intestinal  
13 Epithelium. *Annu Rev Physiol* *78*, 277-299.
- 14 Gross, S., Garofalo, D.C., Balderes, D.A., Mastracci, T.L., Dias, J.M., Perlmann, T., Ericson, J., and  
15 Sussel, L. (2016). The novel enterochromaffin marker *Lmx1a* regulates serotonin biosynthesis in  
16 enteroendocrine cell lineages downstream of *Nkx2.2*. *Development* *143*, 2616-2628.
- 17 Habib, A.M., Richards, P., Cairns, L.S., Rogers, G.J., Bannon, C.A., Parker, H.E., Morley, T.C., Yeo, G.S.,  
18 Reimann, F., and Gribble, F.M. (2012). Overlap of endocrine hormone expression in the mouse  
19 intestine revealed by transcriptional profiling and flow cytometry. *Endocrinology* *153*, 3054-3065.
- 20 He, L., Si, G., Huang, J., Samuel, A.D.T., and Perrimon, N. (2018). Mechanical regulation of stem-cell  
21 differentiation by the stretch-activated Piezo channel. *Nature* *555*, 103-106.
- 22 Julie Piccand, C.V., Florence Blot, Aline Meunier, Anthony Beucher, Perrine Strasser, Mari L. Lund,  
23 Sabitri Ghimire, Laure Nivlet, Céline Lapp, Natalia Petersen, Maja S. Engelstoft, Christelle Thibault-  
24 Carpentier, Céline Keime, Sara Jimenez Correa, Valérie Schreiber, Nacho Molina, Thue W. Schwartz,  
25 Adèle De Arcangelis, Gérard Gradwohl (2019). *Rfx6* promotes the differentiation of peptide-  
26 secreting enteroendocrine cells while repressing genetic programs controlling serotonin production.  
27 *BioRxiv*.
- 28 Kalwat, M.A., Huang, Z., Wichaidit, C., McGlynn, K., Earnest, S., Savoia, C., Dioum, E.M., Schneider,  
29 J.W., Hutchison, M.R., and Cobb, M.H. (2016). Isoxazole Alters Metabolites and Gene Expression,

- 1 Decreasing Proliferation and Promoting a Neuroendocrine Phenotype in beta-Cells. *ACS Chem Biol*  
2 *11*, 1128-1136.
- 3 Kim, K.A., Kakitani, M., Zhao, J., Oshima, T., Tang, T., Binnerts, M., Liu, Y., Boyle, B., Park, E., Emtage,  
4 P., et al. (2005). Mitogenic influence of human R-spondin1 on the intestinal epithelium. *Science* *309*,  
5 1256-1259.
- 6 Kim, Y.H., Larsen, H.L., Rue, P., Lemaire, L.A., Ferrer, J., and Grapin-Botton, A. (2015). Cell cycle-  
7 dependent differentiation dynamics balances growth and endocrine differentiation in the pancreas.  
8 *PLoS Biol* *13*, e1002111.
- 9 Knudsen, L.A., Petersen, N., Schwartz, T.W., and Egerod, K.L. (2015). The MicroRNA Repertoire in  
10 Enteroendocrine Cells: Identification of miR-375 as a Potential Regulator of the Enteroendocrine  
11 Lineage. *Endocrinology* *156*, 3971-3983.
- 12 Li, H.J., Ray, S.K., Singh, N.K., Johnston, B., and Leiter, A.B. (2011). Basic helix-loop-helix transcription  
13 factors and enteroendocrine cell differentiation. *Diabetes Obes Metab* *13 Suppl 1*, 5-12.
- 14 Luche, H., Weber, O., Nageswara Rao, T., Blum, C., and Fehling, H.J. (2007). Faithful activation of an  
15 extra-bright red fluorescent protein in "knock-in" Cre-reporter mice ideally suited for lineage tracing  
16 studies. *Eur J Immunol* *37*, 43-53.
- 17 Melvin, A., le Roux, C.W., and Docherty, N.G. (2016). The Gut as an Endocrine Organ: Role in the  
18 Regulation of Food Intake and Body Weight. *Curr Atheroscler Rep* *18*, 49.
- 19 Muraro, M.J., Dharmadhikari, G., Grun, D., Groen, N., Dielen, T., Jansen, E., van Gurp, L., Engelse,  
20 M.A., Carlotti, F., de Koning, E.J., et al. (2016). A Single-Cell Transcriptome Atlas of the Human  
21 Pancreas. *Cell Syst* *3*, 385-394 e383.
- 22 Mutoh, H., Fung, B.P., Naya, F.J., Tsai, M.J., Nishitani, J., and Leiter, A.B. (1997). The basic helix-loop-  
23 helix transcription factor BETA2/NeuroD is expressed in mammalian enteroendocrine cells and  
24 activates secretin gene expression. *Proc Natl Acad Sci U S A* *94*, 3560-3564.
- 25 Mutoh, H., Naya, F.J., Tsai, M.J., and Leiter, A.B. (1998). The basic helix-loop-helix protein BETA2  
26 interacts with p300 to coordinate differentiation of secretin-expressing enteroendocrine cells. *Genes*  
27 *Dev* *12*, 820-830.

- 1 Naya, F.J., Huang, H.P., Qiu, Y., Mutoh, H., DeMayo, F.J., Leiter, A.B., and Tsai, M.J. (1997). Diabetes,  
2 defective pancreatic morphogenesis, and abnormal enteroendocrine differentiation in  
3 BETA2/neuroD-deficient mice. *Genes Dev* *11*, 2323-2334.
- 4 Petersen, N., Frimurer, T.M., Terndrup Pedersen, M., Egerod, K.L., Wewer Albrechtsen, N.J., Holst,  
5 J.J., Grapin-Botton, A., Jensen, K.B., and Schwartz, T.W. (2018). Inhibiting RHOA Signaling in Mice  
6 Increases Glucose Tolerance and Numbers of Enteroendocrine and Other Secretory Cells in the  
7 Intestine. *Gastroenterology* *155*, 1164-1176 e1162.
- 8 Petersen, N., Reimann, F., Bartfeld, S., Farin, H.F., Ringnalda, F.C., Vries, R.G., van den Brink, S.,  
9 Clevers, H., Gribble, F.M., and de Koning, E.J. (2014). Generation of L cells in mouse and human small  
10 intestine organoids. *Diabetes* *63*, 410-420.
- 11 Petersen, N., Reimann, F., van Es, J.H., van den Berg, B.M., Kroone, C., Pais, R., Jansen, E., Clevers, H.,  
12 Gribble, F.M., and de Koning, E.J. (2015). Targeting development of incretin-producing cells increases  
13 insulin secretion. *J Clin Invest* *125*, 379-385.
- 14 Pinney, S.E., Oliver-Krasinski, J., Ernst, L., Hughes, N., Patel, P., Stoffers, D.A., Russo, P., and De Leon,  
15 D.D. (2011). Neonatal diabetes and congenital malabsorptive diarrhea attributable to a novel  
16 mutation in the human neurogenin-3 gene coding sequence. *J Clin Endocrinol Metab* *96*, 1960-1965.
- 17 Rubio-Cabezas, O., Jensen, J.N., Hodgson, M.I., Codner, E., Ellard, S., Serup, P., and Hattersley, A.T.  
18 (2011). Permanent Neonatal Diabetes and Enteric Anendocrinosis Associated With Biallelic  
19 Mutations in NEUROG3. *Diabetes* *60*, 1349-1353.
- 20 Sadek, H., Hannack, B., Choe, E., Wang, J., Latif, S., Garry, M.G., Garry, D.J., Longgood, J., Frantz, D.E.,  
21 Olson, E.N., et al. (2008). Cardiogenic small molecules that enhance myocardial repair by stem cells.  
22 *Proc Natl Acad Sci U S A* *105*, 6063-6068.
- 23 Sam, A.H., Troke, R.C., Tan, T.M., and Bewick, G.A. (2012). The role of the gut/brain axis in  
24 modulating food intake. *Neuropharmacology* *63*, 46-56.
- 25 Schneider, J.W., Gao, Z., Li, S., Farooqi, M., Tang, T.S., Bezprozvanny, I., Frantz, D.E., and Hsieh, J.  
26 (2008). Small-molecule activation of neuronal cell fate. *Nat Chem Biol* *4*, 408-410.
- 27 Schonhoff, S.E., Giel-Moloney, M., and Leiter, A.B. (2004a). Minireview: Development and  
28 differentiation of gut endocrine cells. *Endocrinology* *145*, 2639-2644.

- 1 Schonhoff, S.E., Giel-Moloney, M., and Leiter, A.B. (2004b). Neurogenin 3-expressing progenitor cells  
2 in the gastrointestinal tract differentiate into both endocrine and non-endocrine cell types.  
3 *Developmental biology* 270, 443-454.
- 4 Sinagoga, K.L., McCauley, H.A., Munera, J.O., Reynolds, N.A., Enriquez, J.R., Watson, C., Yang, H.C.,  
5 Helmraath, M.A., and Wells, J.M. (2018). Deriving functional human enteroendocrine cells from  
6 pluripotent stem cells. *Development* 145.
- 7 Spence, J.R., Mayhew, C.N., Rankin, S.A., Kuhar, M.F., Vallance, J.E., Tolle, K., Hoskins, E.E.,  
8 Kalinichenko, V.V., Wells, S.I., Zorn, A.M., et al. (2011). Directed differentiation of human pluripotent  
9 stem cells into intestinal tissue in vitro. *Nature* 470, 105-109.
- 10 Stanger, B.Z., Datar, R., Murtaugh, L.C., and Melton, D.A. (2005). Direct regulation of intestinal fate  
11 by Notch. *Proc Natl Acad Sci U S A* 102, 12443-12448.
- 12 Stuart, T., Butler, A., Hoffman, P., Hafemeister, C., Papalexi, E., Mauck, W.M., 3rd, Hao, Y., Stoeckius,  
13 M., Smibert, P., and Satija, R. (2019). Comprehensive Integration of Single-Cell Data. *Cell* 177, 1888-  
14 1902 e1821.
- 15 Tsakmaki A, F.P.P.a.B.G. (2017). 3D intestinal organoids in metabolic research: Virtual reality in a  
16 dish. *Current Opinion in Pharmacology*, 51-58.
- 17 Yabut, J.M., Crane, J.D., Green, A.E., Keating, D.J., Khan, W.I., and Steinberg, G.R. (2019). Emerging  
18 Roles for Serotonin in Regulating Metabolism: New Implications for an Ancient Molecule. *Endocr Rev*  
19 40, 1092-1107.
- 20 Ye, D.Z., and Kaestner, K.H. (2009). Foxa1 and Foxa2 control the differentiation of goblet and  
21 enteroendocrine L- and D-cells in mice. *Gastroenterology* 137, 2052-2062.
- 22 Zecchini, V., Domaschensz, R., Winton, D., and Jones, P. (2005). Notch signaling regulates the  
23 differentiation of post-mitotic intestinal epithelial cells. *Genes Dev* 19, 1686-1691.
- 24 Zhu, Z., Ma, B., Homer, R.J., Zheng, T., and Elias, J.A. (2001). Use of the tetracycline-controlled  
25 transcriptional silencer (tTS) to eliminate transgene leak in inducible overexpression transgenic mice.  
26 *J Biol Chem* 276, 25222-25229.
- 27  
28  
29

1 Key resources table:

2

| Reagent or resource                                      | Source                 | Identifier            |
|----------------------------------------------------------|------------------------|-----------------------|
| <b>Antibodies</b>                                        |                        |                       |
| rabbit anti-Chromogranin A                               | Abcam                  | ab15160               |
| Goat anti- serotonin                                     | Immunostar             | 20079                 |
| Alexa Fluor® 488-AffiniPure Donkey anti-Rabbit IgG (H+L) | Jackson ImmunoResearch | 711-545-152-JIR-0.5mg |
| Alexa Fluor 594-AffiniPure Donkey anti-goat IgG (H+L)    | Jackson ImmunoResearch | 705-585-803           |
| <b>Chemicals, Peptides, and Recombinant Proteins</b>     |                        |                       |
| Advanced DMEM/F-12                                       | Gibco                  | 12634010              |
| GlutaMAX                                                 | Gibco                  | 11574466              |
| HEPES                                                    | Gibco                  | 15630049              |
| Penicillin/Streptomycin                                  | Sigma-Aldrich          | P4333                 |
| Wnt3a conditioned medium                                 | In-house production    | -                     |
| R-spondin 1 conditioned medium                           | In-house production    | -                     |
| Recombinant murine Noggin                                | Peprotech              | 250-38-100            |
| B27 Supplement                                           | Gibco                  | 17504044              |
| N2 Supplement                                            | Gibco                  | 17502048              |
| N-Acetylcysteine                                         | Sigma-Aldrich          | A9165                 |
| EGF Recombinant Mouse Protein                            | Gibco                  | PMG8041               |
| Nicotinamide                                             | Sigma-Aldrich          | N0636                 |
| Gastrin                                                  | Sigma-Aldrich          | G9145                 |
| A 83-01                                                  | Tocris                 | 2939                  |
| SB-202190                                                | Sigma-Aldrich          | S7067                 |
| Y-27632                                                  | Sigma-Aldrich          | Y0503                 |
| CHIR99021                                                | Sigma-Aldrich          | SML1046               |
| EDTA                                                     | Invitrogen             | 15575-038             |
| DTT                                                      | Sigma-Aldrich          | 10197777001           |
| Matrigel                                                 | Corning                | 356231                |
| BME                                                      | Amsbio                 | 3533-010-02           |
| 10x Tryple Select                                        | Gibco                  | 12563011              |
| DMSO                                                     | Sigma-Aldrich          | D8419                 |
| DAPT                                                     | Sigma-Aldrich          | D5942                 |
| PD0325901                                                | Sigma-Aldrich          | PZ0162                |
| ISX-9                                                    | Tocris Bioscience      | 4439                  |
| Opti-MEM                                                 | Gibco                  | 31985062              |
| BTX Molecular Delivery Systems™ Electroporation Reagent  | Fisher Scientific      | 15417350              |
| TRI Reagent LS                                           | Sigma-Aldrich          | T3934                 |
| Bovine deoxyribonuclease I                               | Sigma-Aldrich          | D5025-15KU            |
| Ultra-pure glycogen                                      | Invitrogen             | 10814-010             |
| Isopropanol                                              | Sigma                  | I9516                 |
| Cell Recovery Solution                                   | Corning                | 354253                |
| RNase-Free DNase Set                                     | Qiagen                 | 79254                 |
| QuantiFast SYBR Green                                    | Qiagen                 | 204056                |
| Formaldehyde solution >34.5%                             | Sigma-Aldrich          | 15512                 |
| Hoechst 33342                                            | Invitrogen             | H1399                 |

|                                                                        |                         |                                                                   |
|------------------------------------------------------------------------|-------------------------|-------------------------------------------------------------------|
| Bovine Serum Albumin                                                   | Sigma-Aldrich           | A7906                                                             |
| Triton-X 100                                                           | Sigma-Aldrich           | X100                                                              |
| Donkey serum                                                           | Sigma-Aldrich           | D9663                                                             |
| Vectashield Vibrance Antifade Mounting Medium                          | Vector Laboratories     | H-1700-2                                                          |
| Fura 2AM                                                               | Sigma-Aldrich           | F0888                                                             |
| Pluronic F-127                                                         | Invitrogen              | P-3000MP                                                          |
| Probenecid                                                             | Tocris                  | 4107/50                                                           |
| XhoI restriction enzyme                                                | Promega                 | R6161                                                             |
| SpeI restriction enzyme                                                | Promega                 | R6591                                                             |
| Hygromycin                                                             | Cambridge Bioscience    | H007                                                              |
| Doxycycline                                                            | Cambridge Bioscience    | D006                                                              |
| <b>Kits</b>                                                            |                         |                                                                   |
| RNeasy Mini Kit                                                        | Qiagen                  | 74104                                                             |
| High-Capacity cDNA reverse Transcription Kit                           | Applied Biosystems      | 4368813                                                           |
| Click-iT™ EdU Cell Proliferation Kit for Imaging, Alexa Fluor™ 647 dye | Invitrogen              | C10340                                                            |
| 5-HT ELISA                                                             | Aviva System Biology    | OKEH02558                                                         |
| GenElute™ Gel Extraction Kit                                           | Sigma                   | NA1111                                                            |
| In-Fusion HD Cloning kit                                               | Clontech                | 638909                                                            |
| <b>Experimental Models: Cell Lines</b>                                 |                         |                                                                   |
| HEK293T-HA-Rspol-Fc cell line                                          | Dr Calvin Kuo           | (Kim et al., 2005)                                                |
| L-Wnt3A cell line                                                      | Dr Hans Clever          | (Farin et al., 2012)                                              |
| Human small intestinal organoids                                       | This study              |                                                                   |
| Human small intestinal organoids overexpressing <i>Pax4</i>            | This study              |                                                                   |
| <b>Experimental Models: Organisms/Strains</b>                          |                         |                                                                   |
| Tg(Neurog3-RFP) (Ngn3-RFP)                                             | Prof Anne Grapin-Botton | (Kim et al., 2015)                                                |
| Tg(Neurog3-Cre)C1Able/J::R26-loxSTOPlox-tdRFP (Ngn3-Cre-RFP)           | Dr Mathieu Latreille    |                                                                   |
| CCK-iCre::R26-loxSTOPlox-eYFP (CCK-Cre-Rosa-eYFP)                      | Dr Giuseppe D'Agostino  | (D'Agostino et al., 2016; Flak et al., 2014)                      |
| <b>Oligonucleotides</b>                                                |                         |                                                                   |
| QuantiTect Primer Assays                                               | Qiagen                  | 204056                                                            |
| Pax4 cDNA-F                                                            | IDT                     | 5' - CAA AGA ATT CCT CGA ATG CAG CAG GAC GGA CT - 3'              |
| Pax4 cDNA-R                                                            | IDT                     | 5' - AGG CCA TGG CAC TAG TTA TGG CCA GTT TGA GCA ATG GGT TGA - 3' |
| <b>Recombinant DNA</b>                                                 |                         |                                                                   |
| pPB-tetO-MCS-IRES-mCherry plasmid                                      | Dr Bon-Kyoung Koo       | Gift                                                              |
| pPB-CAG-rtTA-IRES-Hygro plasmid                                        | Dr Bon-Kyoung Koo       | Gift                                                              |



|                                 |                       |             |
|---------------------------------|-----------------------|-------------|
| pCAG-PBase plasmid              | Dr Bon-Kyoung Koo     | Gift        |
| <b>Software and algorithms</b>  |                       |             |
| MetaFluor v7.7.8.0              | Molecular Devices LLC | N/A         |
| Graph Pad Prism Version 8.1.2   | Graphpad Software     | N/A         |
| Fiji-ImageJ                     | Open Source           | N/A         |
| FlowJo                          | Treestar              | N/A         |
| <b>Equipment</b>                |                       |             |
| LightCycler® 480                | Roche Life Sciences   | 05015278001 |
| LightCycler® 96                 | Roche Life Sciences   | 05815916001 |
| BD FACS Aria™ II                | Beckton Dickinson     | N/A         |
| BD FACS Canto™ II               | Beckton Dickinson     | N/A         |
| BD Fortessa™ cell analyser      | Beckton Dickinson     | N/A         |
| EOS 600D camera                 | Canon                 | N/A         |
| A1 inverted confocal microscope | Nikon                 | N/A         |
| BioStation IM-Q                 | Nikon                 | N/A         |
| NEPA21 Electroporator           | Nepagene              | N/A         |
| Axiovert 135 microscope         | Zeiss                 | N/A         |
| TMS Inverted Microscope         | Nikon                 | N/A         |

1

## 2 **Crypt isolation and mouse intestinal organoid culture**

3 Mouse small intestines were harvested and cleaned with cold PBS and separated into 2 parts:  
4 duodenum (proximal 5cm), jejunum and ileum. Each part was cut longitudinally, and villi were  
5 scrapped with a glass slide. The tissue was cut with scissors into 2x2 mm pieces and repeatedly  
6 washed. Subsequently, the tissue pieces were incubated with 2 mM EDTA in PBS for 45min, in a rotator  
7 at 4 °C. After removal of EDTA, vigorous shaking in cold PBS lead to release of crypts. Crypts were  
8 further washed in PBS, passed through a 40 µm cell strainer, pelleted and resuspended in BME. Crypts  
9 were plated in 48-well plates, with 200 crypts per 25 µl of BME. The BME was polymerized for 15 min  
10 at 37°C and stem cell growth medium (WENR) supplemented with 10 µM Y-27632 was overlaid. WENR  
11 medium consists of Advanced DMEM/F12, 2 mM GlutaMAX, 10mM HEPES, 100 units/mL  
12 penicillin/streptomycin, 50 ng/mL EGF, 1x B27, 1x N2 supplements (all from Gibco), 1.25 mM N-  
13 Acetylcysteine (Sigma-Aldrich), 100 ng/ml Noggin (Peprotech), 50% Wnt3A conditioned medium and  
14 10% R-spondin-1 conditioned medium (both in house production). Three days later, medium was  
15 changed into differentiation media (ENR) with no Wnt3A or Y-27632. Organoids were passaged once  
16 a week by mechanical dissociation, at a 1:3 split ratio. Plated organoids were maintained in a CO2  
17 incubator with 5% CO2 and the media were changed every other day.

18 Treatment of mouse small intestine organoids with ISX-9 started 3 days after passaging. For dose-  
19 response experiments organoids were treated with 2 µM, 20 µM, 40 µM and 80 µM ISX-9 (Tocris  
20 Bioscience) for 48 hrs. For time-course experiments, organoids were treated with 40 µM ISX-9 for 24  
21 hrs, 48 hrs, and 96 hrs and samples were collected for RNA extraction at the end of each timepoint.

1 Treatment with 10  $\mu$ M KN93 or 10  $\mu$ M KN92 (an inactive analogue of KN93) in the presence or absence  
2 of ISX-9 was also performed for 48 hrs. For the rest of the experiment's organoids were treated with  
3 40  $\mu$ M ISX-9 for 48 hrs and then ISX-9 was removed for another 48 hrs (48-hr ISX-9 pulse).

4

### 5 **Generation and culture of human terminal ileal organoids**

6 Human terminal ileum crypts were isolated from biopsies acquired from patients undergoing  
7 colonoscopy at Guy's and St Thomas' NHS Foundation Trust with their informed consent. Biopsies  
8 were washed in cold PBS until the supernatant was clear. Following 10 minutes incubation at room  
9 temperature with 10 mM DTT, the biopsies were incubated with 8 mM EDTA in PBS, and placed in a  
10 rotator for 1 hr at 4 °C. At the end on the incubation, EDTA was removed and crypts were released  
11 with vigorous shaking in cold PBS. Crypts were further washed in PBS, pelleted and resuspended in  
12 Matrigel, in the same density as mouse crypts. Human intestinal crypts embedded in Matrigel were  
13 overlaid with stem cell growth medium (WENRAS) supplemented with 10  $\mu$ M Y-27632 and 5  $\mu$ M  
14 CHIR99021. Human stem cell growth medium in comparison with the mouse one described above,  
15 additionally contained 10 nM gastrin (Sigma-Aldrich), 500 nM A83-01 (Bio-technie), 10  $\mu$ M SB202190  
16 (Sigma-Aldrich) and 10 mM Nicotinamide (Sigma-Aldrich). 3 days after isolation or splitting, Y-27632  
17 and CHIR99221 were removed from the medium and organoids were either maintained in WENRAS  
18 or transferred into differentiation medium for setting up experiments. For differentiation of human  
19 ileal organoids Wnt3A conditioned medium was reduced from 50% to 15% and SB202190 and  
20 nicotinamide were withdrawn from the medium. Differentiation medium was used for 7 days, keeping  
21 the organoids in culture for 10 days. 5 days after passaging, human terminal ileal organoids were  
22 treated with 40  $\mu$ M ISX-9 for 48 hrs and then ISX-9 was removed for another 48 hrs (48-hr ISX-9 pulse),  
23 except if it is stated differently. MEK signalling was inhibited with 500 nM PD0325901 (Sigma-Aldrich),  
24 and Notch signalling with 10  $\mu$ M DAPT (Sigma-Aldrich). Combination of both inhibitors with ISX-9 was  
25 given in a 48-hr pulse. All control organoids were treated with vehicle.

26

### 27 **RNA extraction and real time quantitative PCR**

28 Total RNA was isolated from organoids (released from Matrigel or BME with Cell Recovery solution  
29 (Corning)) using RNeasy Mini Kit (Qiagen) according to manufacturer's instructions. On-column DNase  
30 digestion was performed for removing any residual genomic DNA (Qiagen). RNA extraction from  
31 sorted cells was performed using TRI Reagent LS according to manufacturer's instruction. cDNA was  
32 generated using the High-Capacity cDNA reverse Transcription Kit (Applied Biosystems). Real time  
33 qPCR was performed using QuantiTect primers and QuantiFast SybrGreen PCR kit (both from Qiagen)  
34 on a LightCycler 480 or LightCycler 96 (Roche). Relative gene expression levels were calculated by

1 averaging the Ct values of technical duplicates for each biological sample and normalizing to the  
2 expression of the housekeeping gene Beta-2-Microglobulin.

3

#### 4 **Evaluation of mouse small intestinal organoid growth**

5 Growth and convolutedness of organoids was evaluated by collecting brightfield images of control and  
6 ISX-9 treated organoids with EOS 600D Nikon camera on an TMS inverted microscope (Nikon) on day  
7 3, 5 and 7 in culture. Surface area, perimeter and number of buds were measured using ImageJ  
8 software.

9

#### 10 **Immunofluorescent staining of organoids**

11 Mouse or human small intestine organoids were fixed for 45 min in 4% formalin and then washed with  
12 2% BSA in PBS. Subsequently, organoids were blocked with blocking buffer consisting of 2% BSA and  
13 5% donkey serum, and permeabilized with 0.5% Triton-X for one hour at room temperature. Primary  
14 antibody incubation was done in a rotor overnight at 4°C with primary antibodies diluted in blocking  
15 buffer. Primary antibody used were rabbit polyclonal anti-Chromogranin A (1:800; Abcam) and goat  
16 polyclonal anti-serotonin (1:100; Immunostar). The next day, organoids were washed and incubated  
17 with secondary antibodies; Alexa Fluor 488 Donkey Anti-Rabbit or Alexa Fluor 594- Donkey anti-goat  
18 (1:500; Jackson ImmunoResearch) for 1 hour at room temperature. Nuclear counterstaining was  
19 performed in parallel with the secondary antibody incubation using Hoechst 33342 (1:2000;  
20 Invitrogen). After washing, organoids were mounted with Vectashield Vibrance Antifade Mounting  
21 Medium (Vector Laboratories).

22 The fraction of proliferating cells in control and ISX-9 treated mouse intestinal organoids was  
23 determined using the Click-iT Edu Cell proliferation kit, Alexa Fluor™ 647 dye (Invitrogen). Organoids  
24 were pre-incubated for 1 hr with 10 μM EdU, then fixed and permeabilized, and Edu positive nuclei  
25 were labelled according to manufacturer's instructions.

26

#### 27 **Immunofluorescent imaging**

28 Live-cell fluorescence imaging was carried out in control and ISX-9 treated Ngn3-RFP, Ngn3-Cre-RFP,  
29 and CCK-Cre-Rosa-eYFP organoids. A continuous z dimension stack of RFP or eYFP fluorescence and  
30 brightfield images was obtained, while organoids were still embedded on BME, using an A1 inverted  
31 confocal microscope (Nikon). Images of whole-mount organoids stained for chromograninA and  
32 serotonin, were also capture with an A1 inverted confocal microscope (Nikon). Image analysis was  
33 performed using either Nikon Elements or Image J software. Time-lapse fluorescent microscopy of

1 induced with Dox human intestinal organoids for overexpression of *Pax4*, was performed with a  
2 BioStation IM-Q (Nikon).

3

#### 4 **Flow cytometry analysis and fluorescent activated cell sorting (FACS)**

5 Control and ISX-9 treated Ngn3-RFP, Ngn3-Cre-RFP and CCK-Cre-Rosa-eYFP organoids were  
6 dissociated into single cells with mechanical disruption after 5 min incubation with TrypLE Express  
7 (Gibco) at 37°C. After washes with PBS the cells were passed through a 40 µm cell strainer and  
8 resuspended in Advanced DMEM/F12 medium with 4 µg/mL DNase, 10 µM Y-27632 and 2 mM EDTA.  
9 1µg/ ml DAPI was added to the cell suspension to label dead cells. Viable cells were analysed in a BD  
10 FACS Canto™ II (Beckton Dickinson). For RNA extraction of Ngn3<sup>+</sup> cells from control and ISX-9 treated  
11 Ngn3-Cre-RFP organoids, organoids were first dissociated into single cells as described above and  
12 immediately sorted using a BD FACS Aria™ II (Beckton Dickinson).

13

#### 14 **Sample preparation for scRNA-seq**

15 Ngn3-Cre-RFP organoids were treated with ISX-9 for 48 hrs, collected and processed for fluorescent  
16 activated cell sorting as described above. DAPI was added just before sorting. RFP-positive, DAPI-  
17 negative cells were sorted into 384-well plates containing 384 unique molecular identifier (UMI)  
18 barcode primer-sets using a FACS Aria™ II (Beckton Dickinson). Samples in plates were centrifuged and  
19 stored at -80° C. Samples were then processed by Single Cell Discoveries B.V. according the SORT-seq  
20 method (Muraro et al., 2016) (Muraro et al., 2016). Briefly, first and second strand synthesis  
21 (Invitrogen) was performed and all wells of a single plate were pooled. After in vitro transcription  
22 (Ambion), the amplified RNA was reverse transcribed and amplified for 10-12 cycles with Illumina  
23 Truseq primers. Finally, libraries were analyzed on an Illumina NextSeq500 using 75-bp pair-end  
24 sequencing.

#### 25 **Analysis single-Cell mRNA Sequencing**

26 Unique molecular identifier (UMI) count matrices were imported into R Studio and processed with the  
27 R package Seurat (version 3.1) (Stuart et al., 2019). For QC, we quantified the proportions of UMIs  
28 mapped to the mitochondrial genome. All the cells with mitochondrial reads > 10% were excluded.  
29 We further filtered cells with >7500 unique features in all 206 control and 216 ISX cells were passed  
30 to analysis. ERCC92 spike-ins as well as genes associated with clustering artefacts (Rn45s, Malat1,  
31 Kcnq1ot1, A630089N07Rik) were also excluded from the final dataset. Control and treated data sets  
32 were merged after QC filtering and then split by treatment for normalisation using the SCTransform  
33 wrapper and percent mitochondrial variations regressed. We calculated a subset of 3000 features to  
34 integrate using the SelectIntegrationFeatures and ensured all pearson residuals were calculated using

1 PrepSCTIntegration. The data sets were then integrated using the FindIntegrationAnchors and the  
2 IntegrateData functions. We then ran an integrated analysis on all cells in the experiment using the  
3 standard workflow using default parameters: linear dimensional reduction using RunPCA, non-linear  
4 dimensional reduction using RunUMAP. A K-nearest neighbour's graph was constructed with the  
5 FindNeighbors function using the first 25 principle components before clustering using the  
6 FindClusters function with a resolution of 1.8. Differential gene analysis for cluster definition was run  
7 using the FindConservedMarkers which reports the top markers conserved between the control and  
8 treated groups.

9

### 10 **Serotonin release from mouse and human small intestine organoids**

11 Serotonin secretion in control and ISX-9 treated mouse organoids was measured after 7 days in culture  
12 and in human organoids after 10 days in culture. A 48-hr ISX-9 pulse was given to both mouse and  
13 human organoids as described above. At the end of the culture period organoids were released from  
14 BME and Matrigel with Cell Recovery solution (Corning), were washed with PBS and incubated with  
15 HEPES saline buffer (of 4.5 mM KCl, 138 mM NaCl, 4.2 mM NaHCO<sub>3</sub>, 1.2mM NaH<sub>2</sub>PO<sub>4</sub>·2H<sub>2</sub>O, 2.6mM  
16 CaCl<sub>2</sub>, 1.2mM MgCl<sub>2</sub> and 10mM HEPES (pH7.4)) with 0.5% BSA for 2 hrs. Serotonin secretion was  
17 stimulated with 10 μM IBMX and 10 μM Forskolin in the presence of 1 μM fluoxetine (for blocking  
18 potential serotonin reuptake via SERT) for 1 hr. Supernatant and organoid lysates were collected for  
19 measuring secretion and content, respectively. Serotonin concentration was measured using an ELISA  
20 kit according to manufacturer's instructions.

21

### 22 **Calcium imaging**

23 30mm petri dishes were coated with BME diluted in Advanced DMEM/F12 (1:100) and left to set at  
24 37 °C for 1 hr. Mouse small intestine organoids were collected and washed 3 times with cold PBS to  
25 dissolve BME and re-seeded in BME-coated petri dishes with ENR medium. After 2 hrs, organoids were  
26 loaded with 7μM Fura 2-AM in HEPES saline buffer containing 0.01% pluronic F127 and 2 mM  
27 probenecid, and incubated for 30 min at 37 °C. Organoids were washed 3 times with HEPES buffer and  
28 images were recorded with an Axiovert 135 Ca<sup>2+</sup> imaging system (Zeiss), at 20x magnification every 80  
29 milliseconds. Cells were excited at 340 nm and 380 nm and emitted light was acquired at 510 nm.  
30 Calcium concentration was calculated by 340/380 fluorescence ratio using a MetaFluor software. ATP  
31 (100μM) was used as positive control. Imaging experiments were performed at least 3 times and  
32 representative time course is presented in manuscript.

33

34

## 1 **Genetic engineering of human terminal ileal organoids**

2 For overexpression of *Pax4* in human terminal ileal organoids, mouse *Pax4* cDNA was cloned into the  
3 pPB-tetO-MCS-IRES-mCherry vector. Briefly, pPB-tetO-MCS-IRES-mCherry vector was first linearized  
4 following sequential digestion with XhoI and SpeI restriction enzymes and gel purified using  
5 GenElute™ Gel Extraction Kit (Sigma). PCR primers for mouse *Pax4* were designed with 15 bp  
6 extensions that are complementary to the ends of the pPB-tetO-MCS-IRES-mCherry linearized vector.  
7 The 15bp extension were required for directional cloning using the In-Fusion HD cloning kit  
8 (Clontech). From this point on, manufacturer instructions were followed. *Pax4* was amplified using  
9 as template cDNA generated from mouse intestinal organoids. The generated plasmid was named  
10 pPB-tetO-*Pax4*-IRES-mCherry. The simultaneous co-transfection of 3 different plasmid is required for  
11 the generation of inducible overexpressing *Pax4* human terminal ileal organoids. These plasmids are:  
12 pPB-tetO-*Pax4*-IRES-mCherry, pPB-CAG-rtTA-IRES-Hygro and pCAG-PBase plasmid. For  
13 electroporation of the 3 plasmids into human terminal ileal cells we followed the protocol from Fujii  
14 *et al* (Fujii *et al.*, 2015). DNA was transfected at 7.2 µg for the two piggyBac vectors, and at 5 µg for  
15 the transposase vector. 5 days post-electroporation cells were selected with 100 µg/ml hygromycin.  
16 Gene expression was induced using 1 µg/ml of Doxycycline.

17

## 18 **Statistics**

19 For cell counting experiments, “n” represents the number of individual organoids assessed. For RNA  
20 experiments, “n” represents the number of biological replicates. All data are presented as mean ±  
21 standard error of the mean (SEM), except violin plots in which data is presented as median and  
22 quartiles. Each “n” is presented as a dot in graphs. Relevant tests described in figure legends. All  
23 statistical analyses were performed using Graph Pad Prism Version 8.1.2 (GraphPad Software) for  
24 Windows or Mac except for RNA-seq where statistics were calculated using Seurat.

25

26



Figure 1

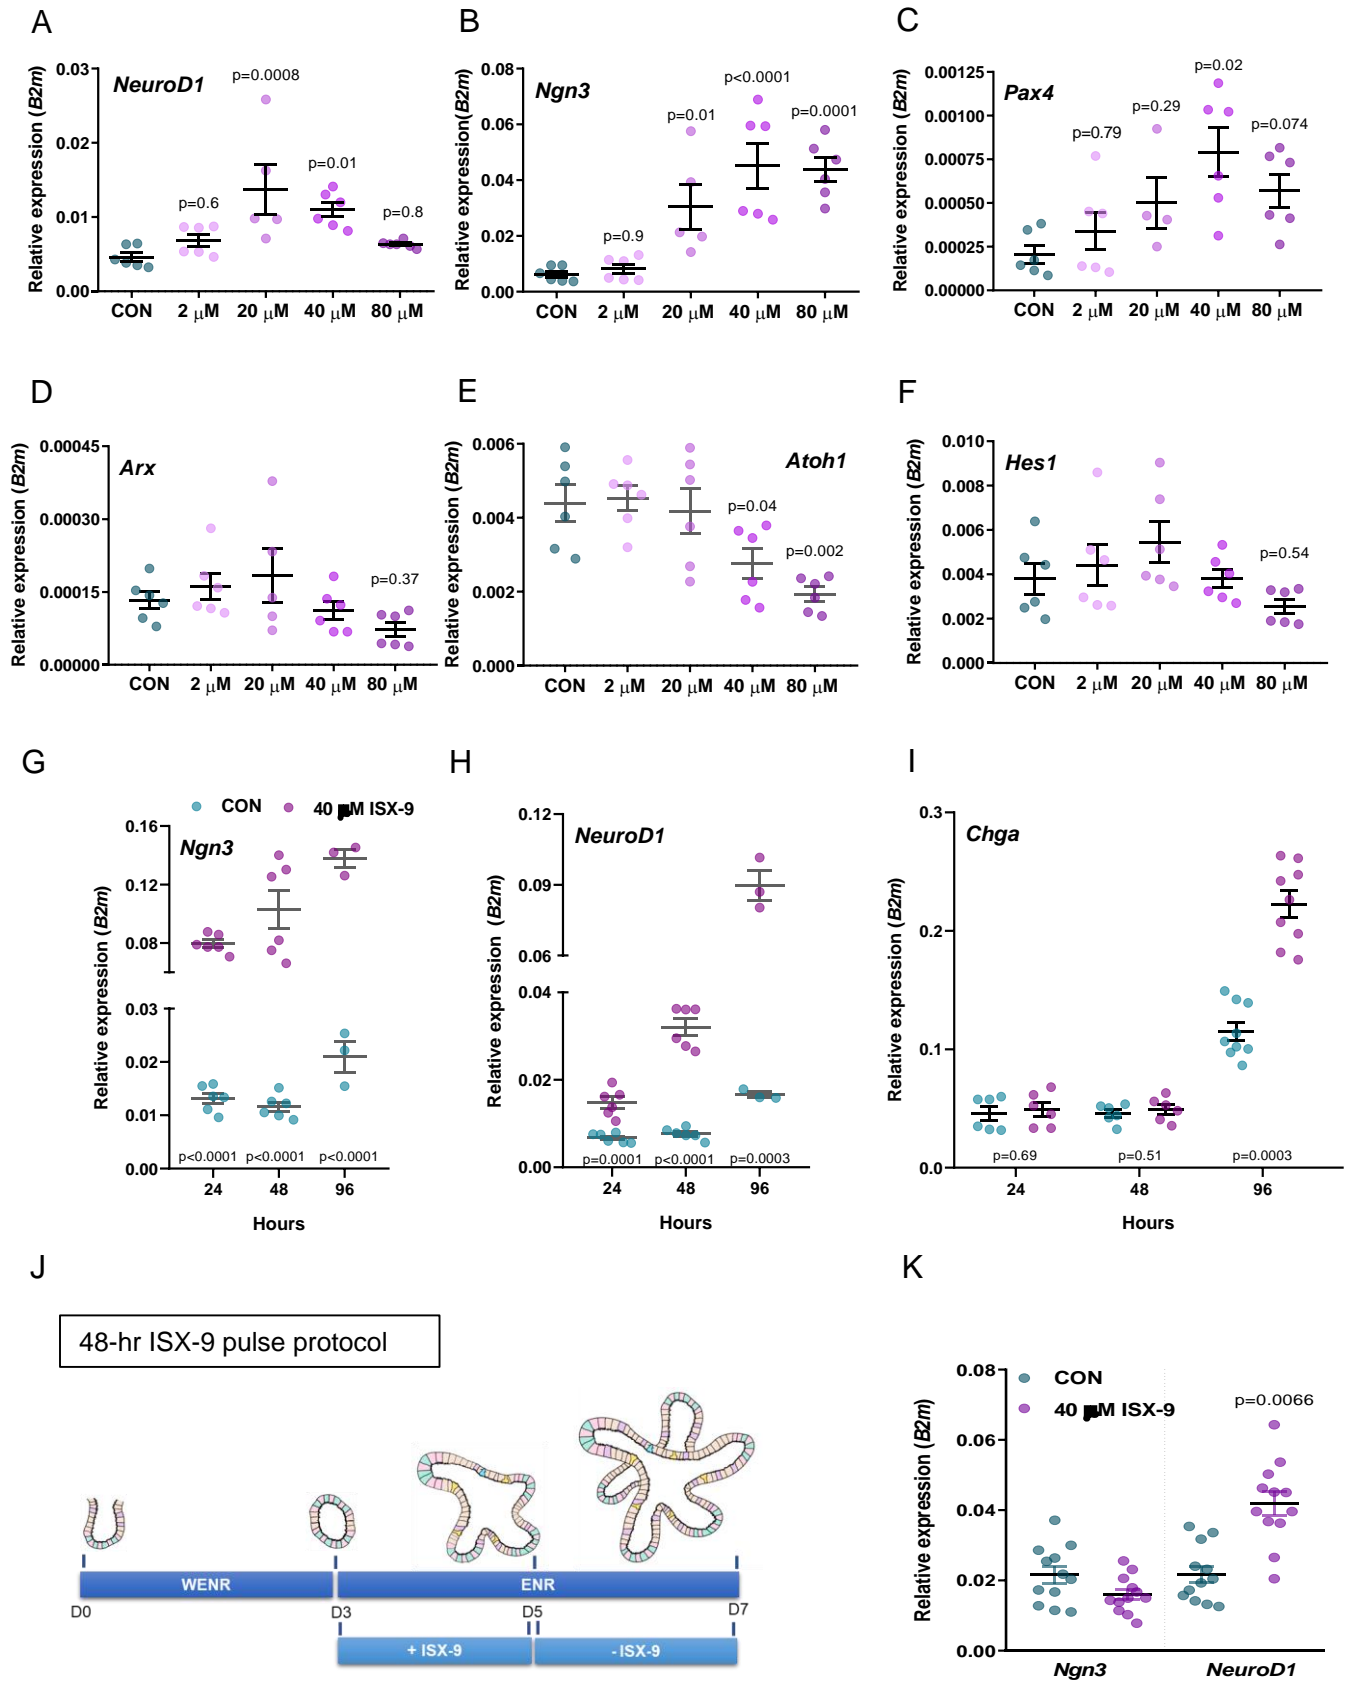

Figure 2

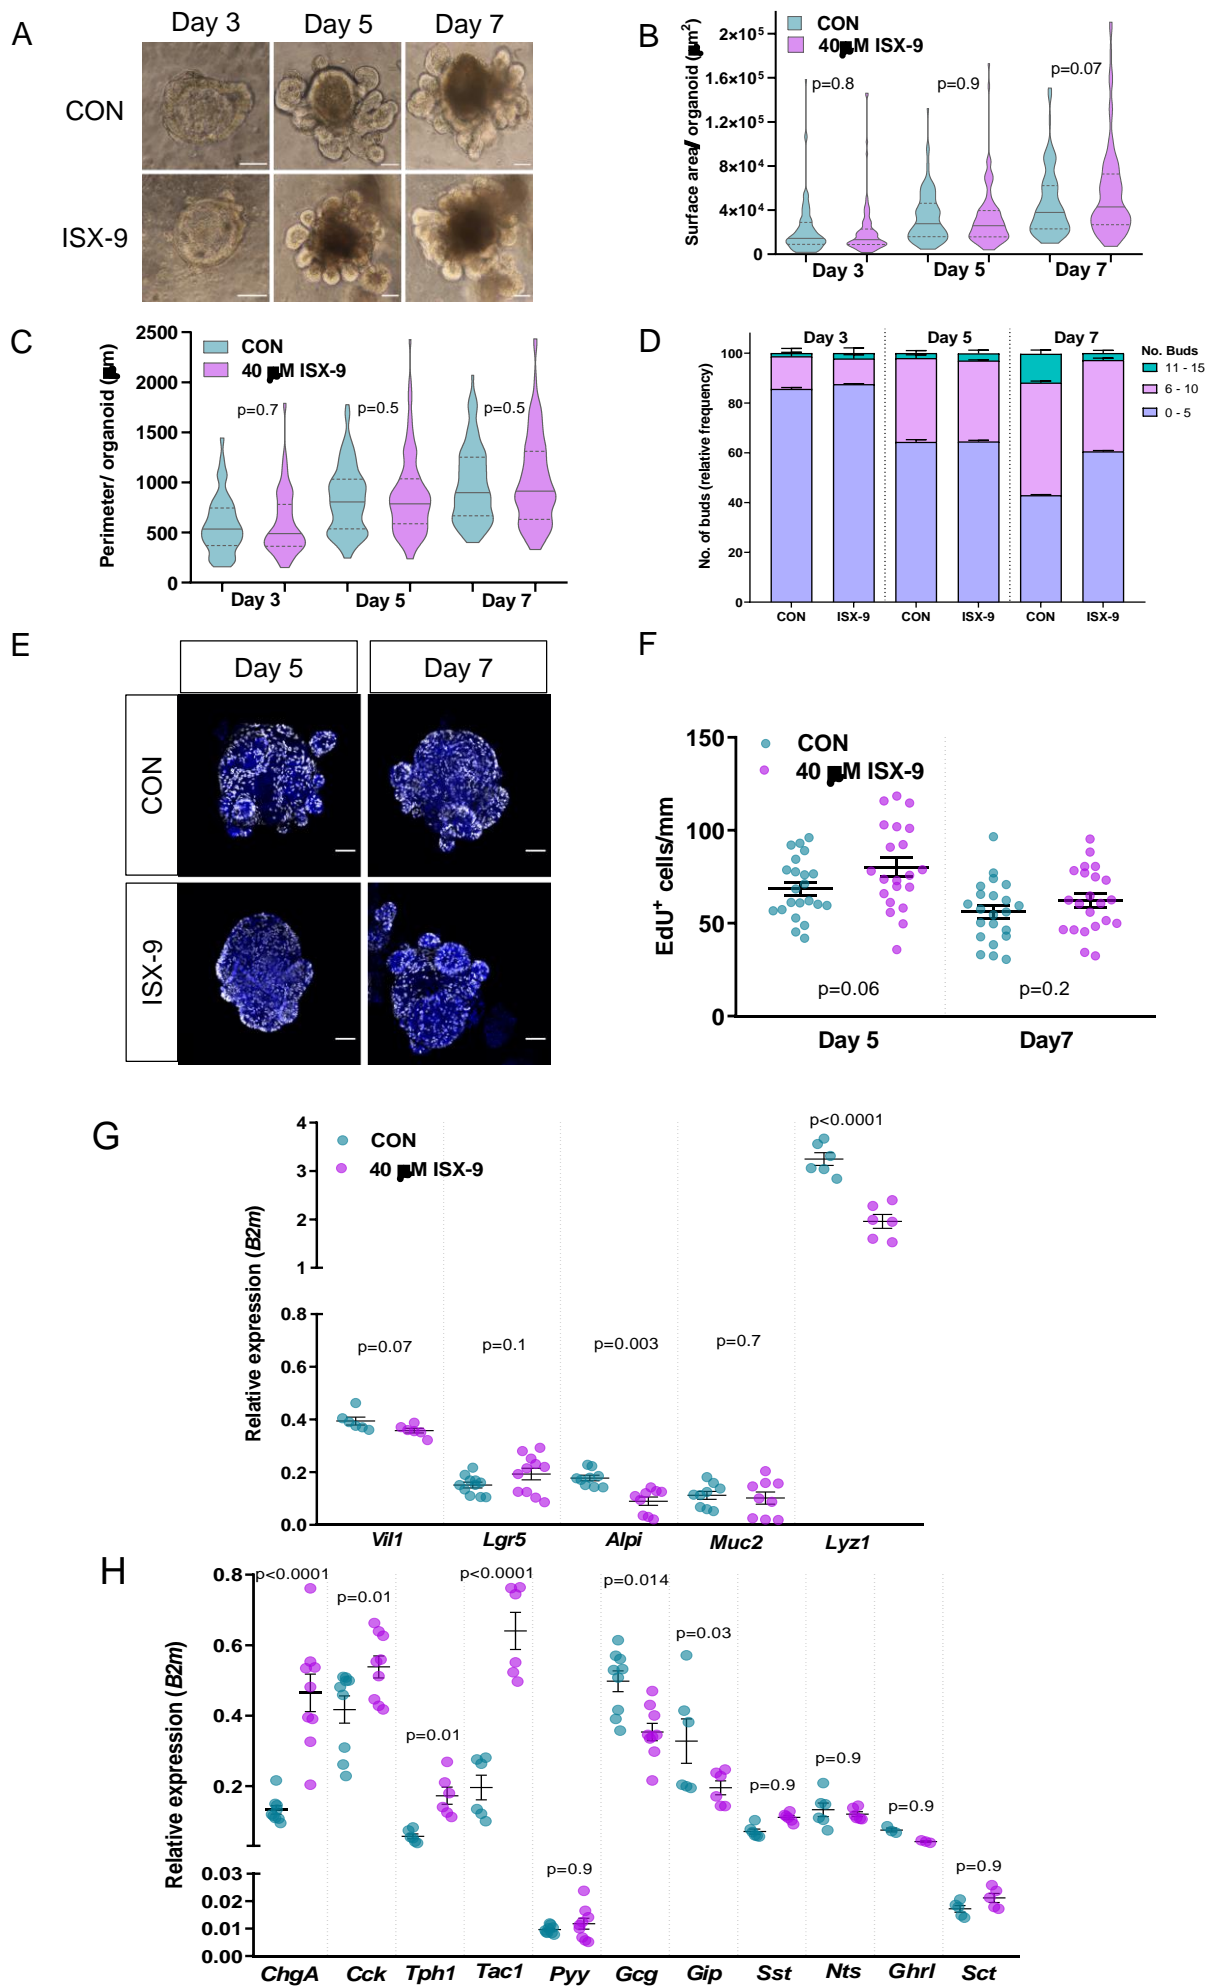

# Figure 3

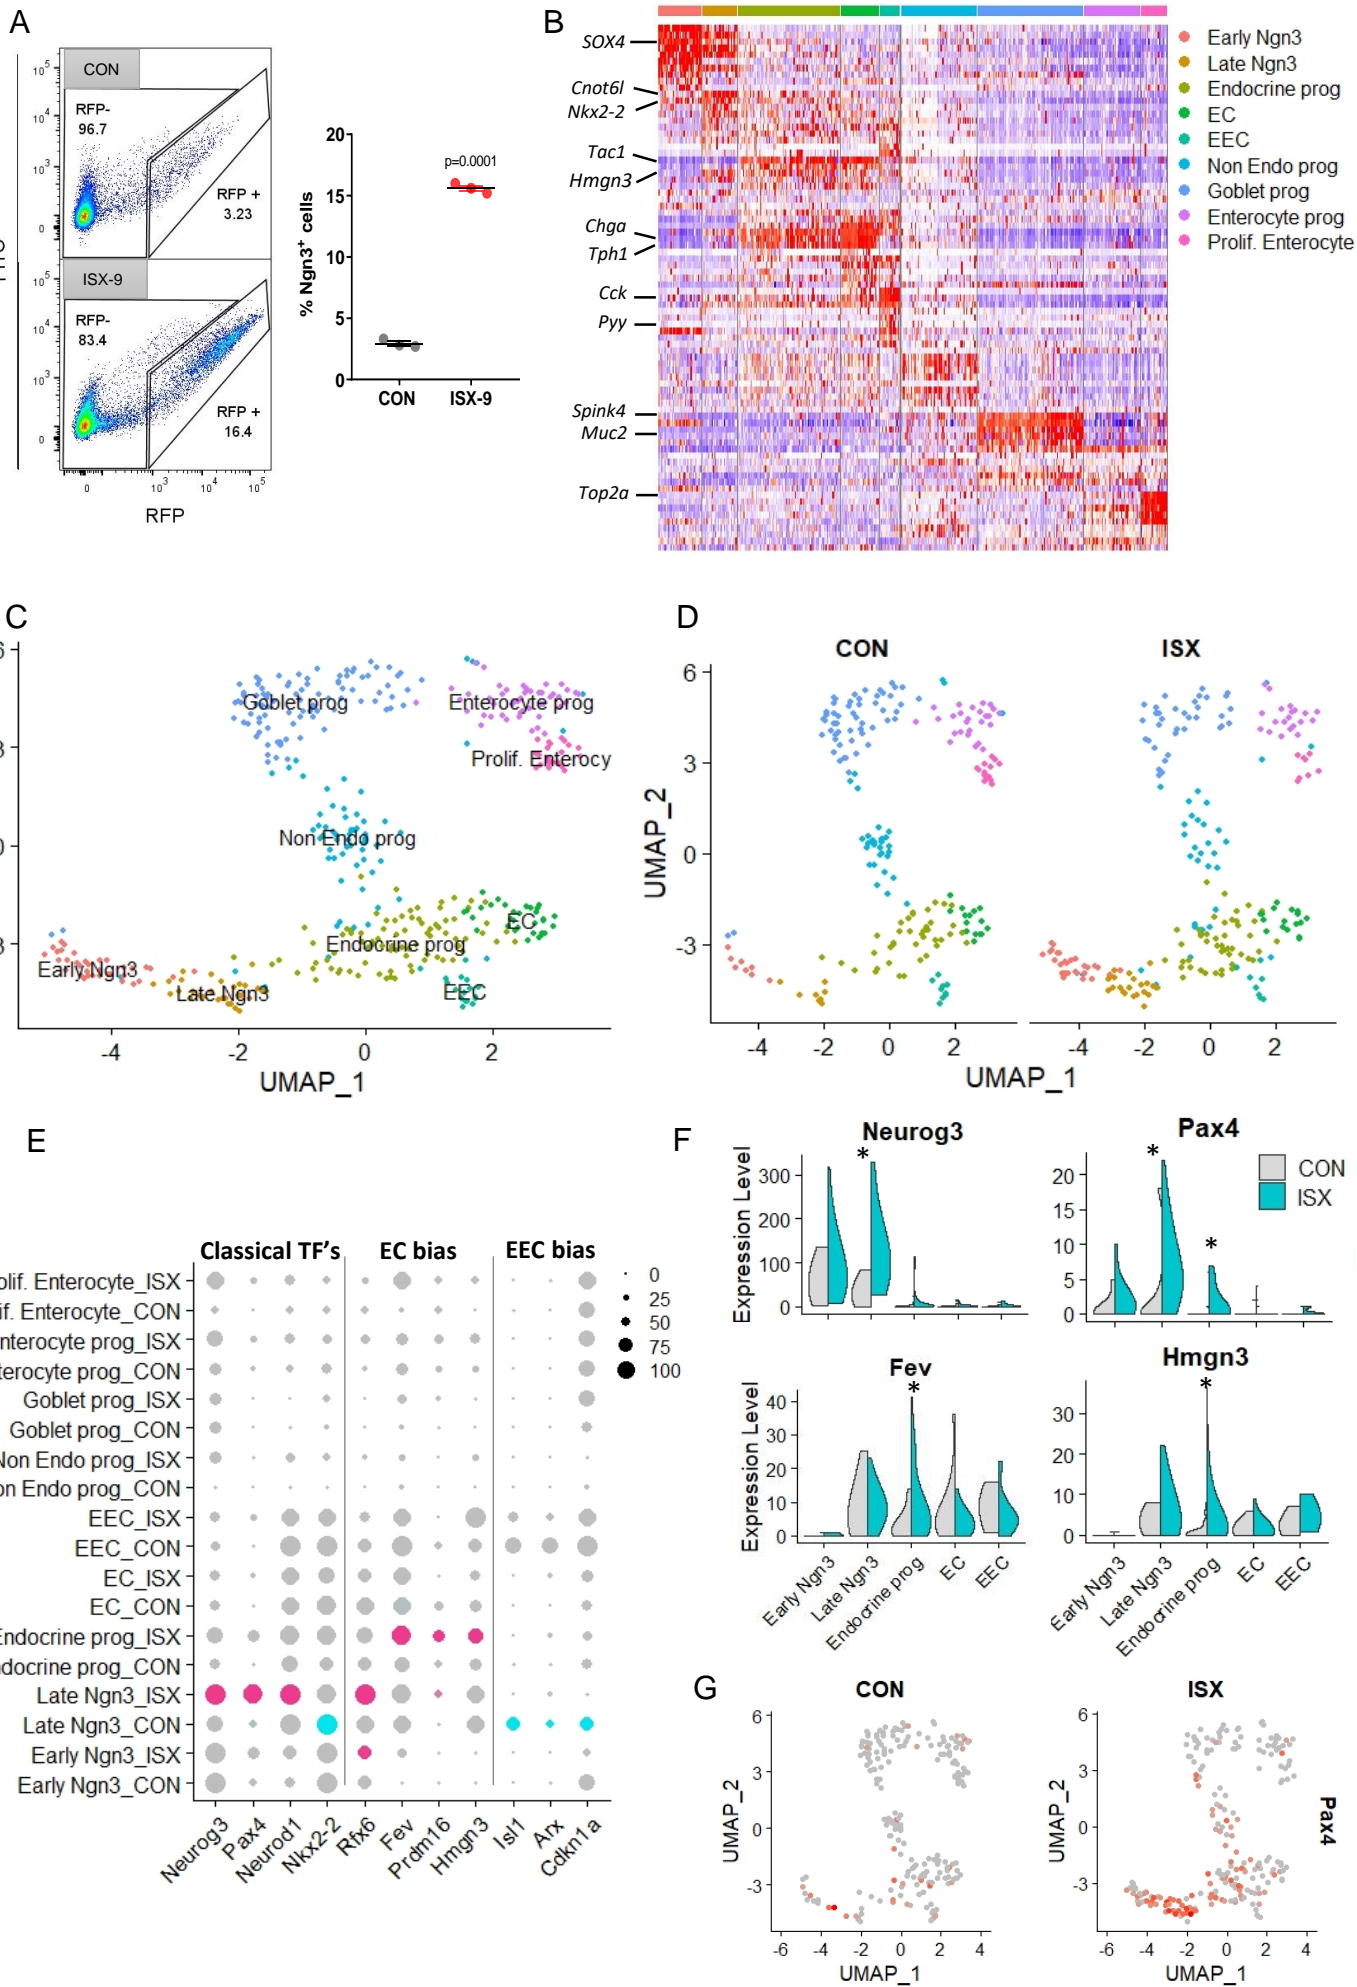

Figure 4

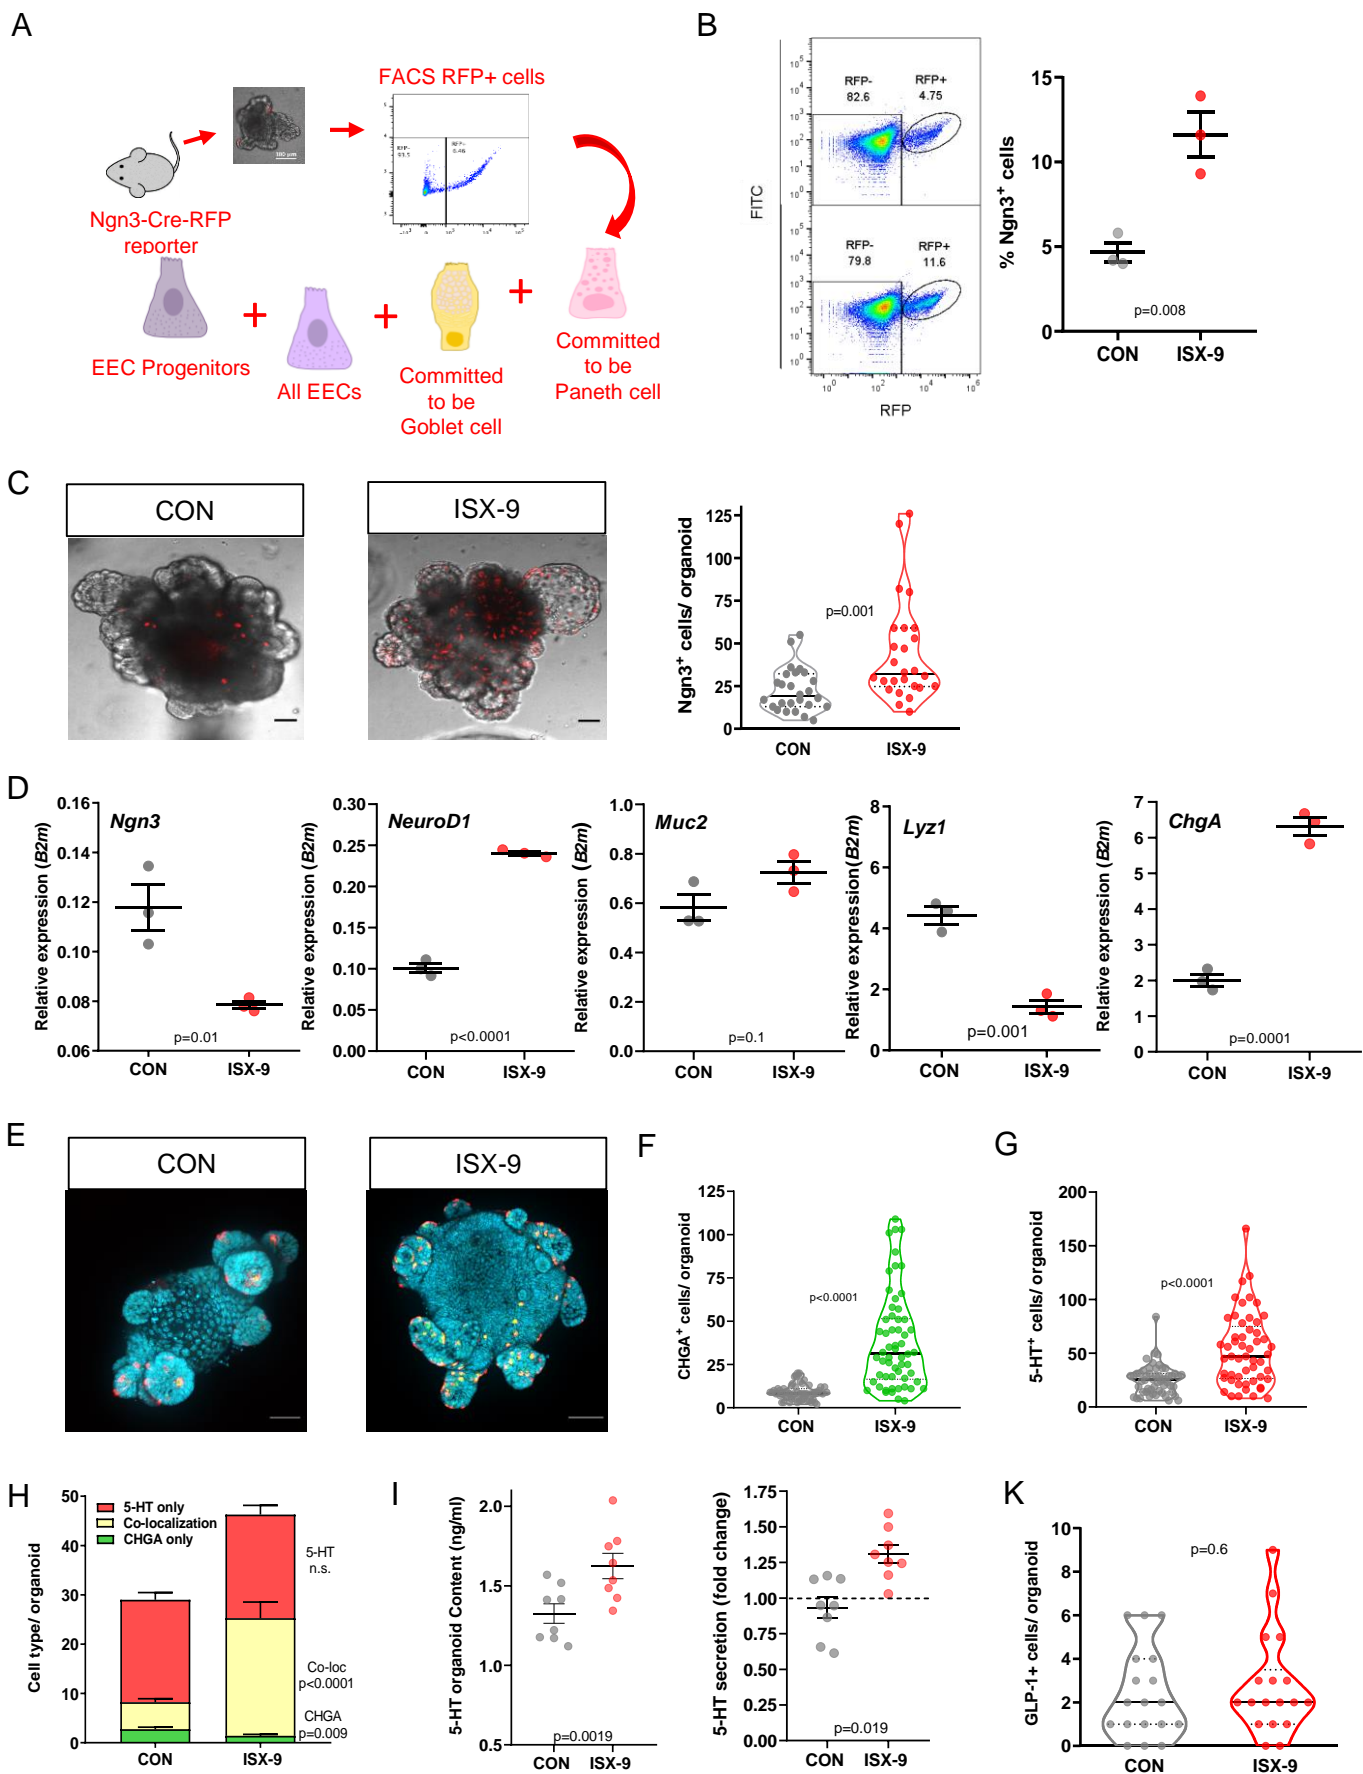

Figure 5

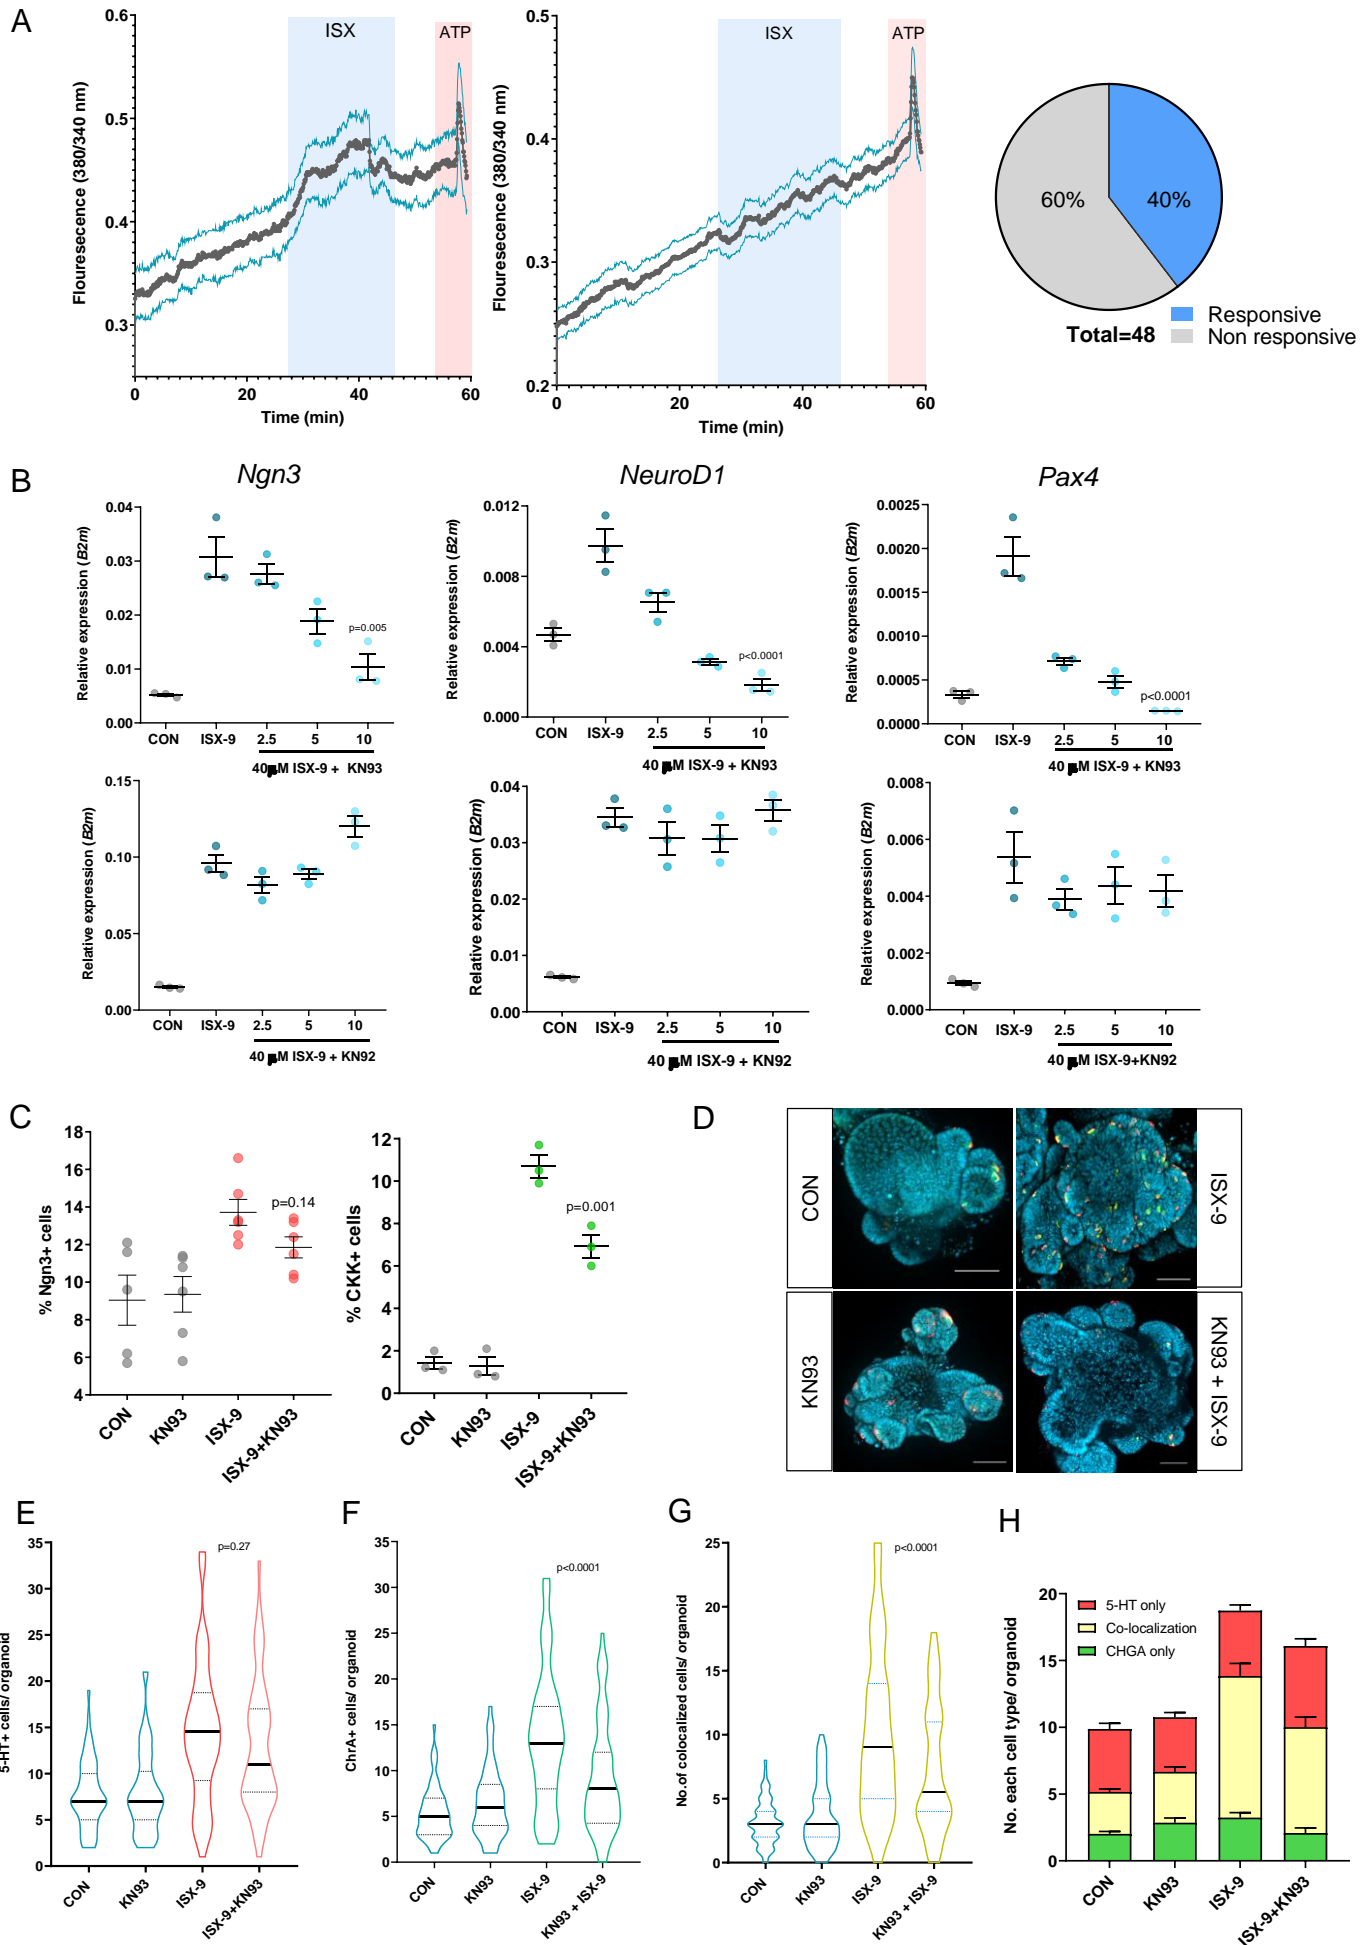



**Figure 6**

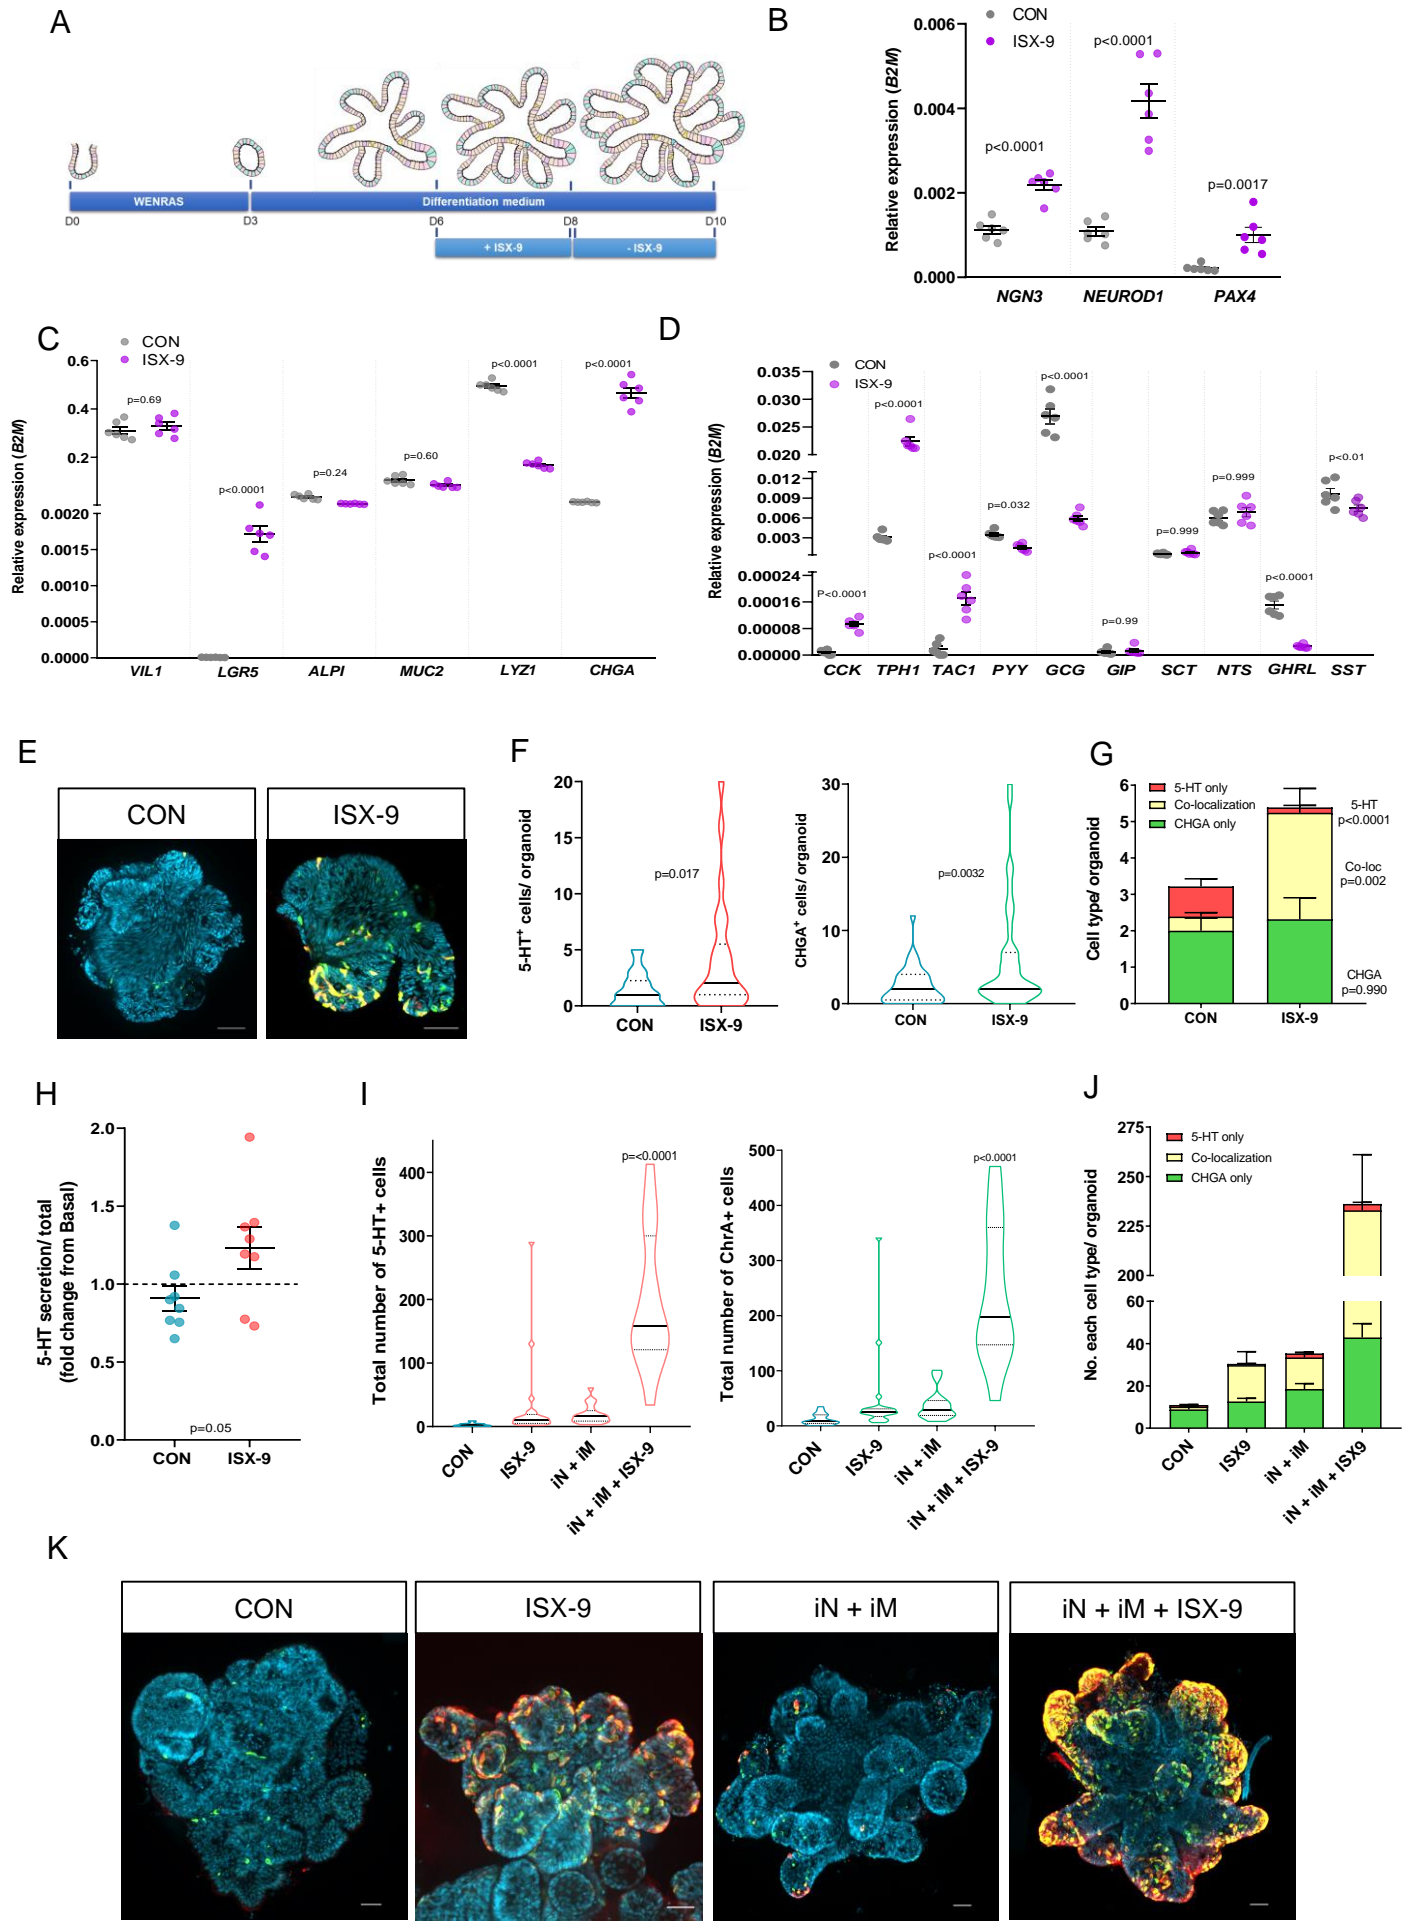

# Figure 7

A

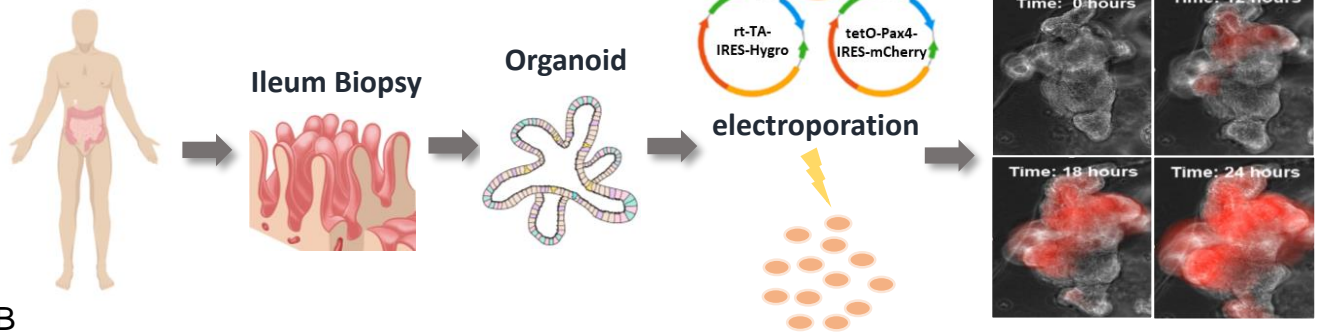

B

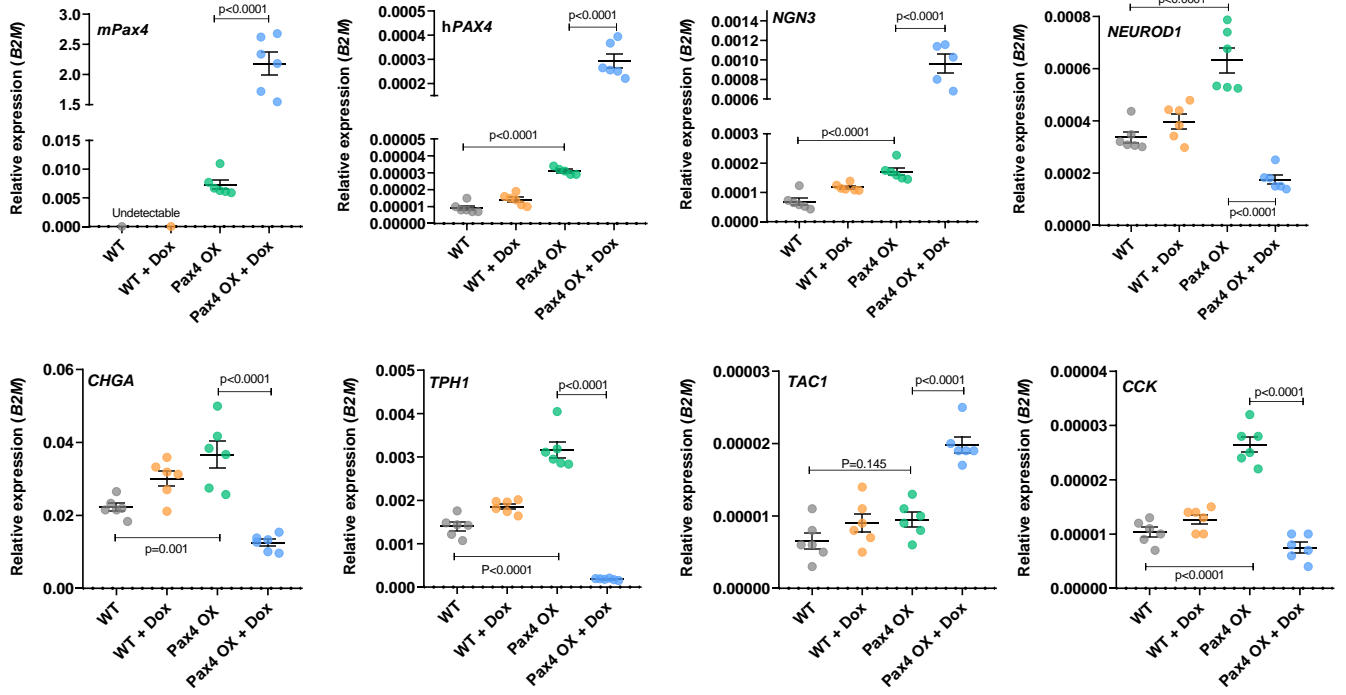

C

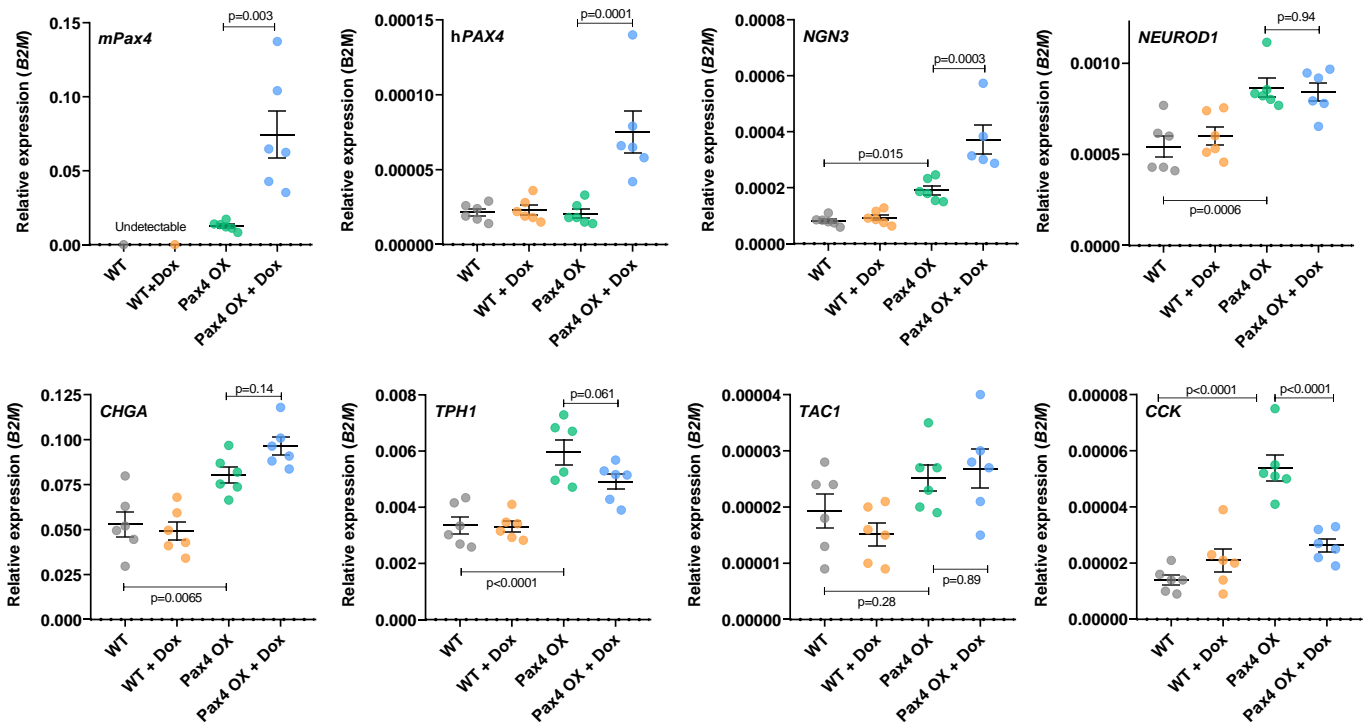

Source: https://www.biorxiv.org/content/10.1101/787788v2.full.pdf
